## **Title: Cortical neuroprosthesis-mediated functional ipsilateral control of locomotion in rats with incomplete spinal cord injury**

**Authors:** Elena Massai<sup>&,1</sup>, Marco Bonizzato<sup>&,1,2</sup>, Marina Martinez<sup>1,2\*</sup>

<sup>&</sup>, These authors contributed equally.

<sup>\*</sup>, correspondence: marina.martinez@umontreal.ca

### **Affiliations**

<sup>1</sup> Département de Neurosciences, Groupe de recherche sur la Signalisation Neurale et la Circuiterie (SNC) and Centre Interdisciplinaire de Recherche sur le Cerveau et l'Apprentissage (CIRCA), Université de Montréal, Québec, Canada.

<sup>2</sup> CIUSSS du Nord-de-l'Île-de-Montréal, Québec, Canada.

### **Abstract**

1 Control of voluntary limb movement is predominantly attributed to the contralateral motor  
2 cortex. Nevertheless, increasing evidence suggests the involvement of ipsilateral cortical  
3 networks in this process. Ipsilateral control particularly emerges in motor tasks requiring  
4 bilateral coordination, which is an essential characteristic of locomotion. Here, we  
5 combined a unilateral thoracic spinal cord injury (SCI) with a cortical neuroprosthetic  
6 intervention that uncovered a functional role of the ipsilateral cortex in rat movement. In  
7 all rats, after SCI, ipsilesional cortex excitation promoted a bilateral synergy, whereby the  
8 elevation of the contralateral foot was complemented by ipsilateral hindlimb extension. In  
9 two animals, we found that stimulation of a medial cortical sub-region modulated  
10 ipsilateral hindlimb flexion. Ipsilateral cortical stimulation delivered after SCI alleviated  
11 multiple locomotor and postural deficits. These results establish a causal link between  
12 cortical activation and a remarkably fine and proportional ipsilateral control of hindlimb  
13 movement, a potential target for future neuroprosthetic technology.

## 1 Introduction

2 Cortical commands primarily regulate contralateral limb movements. This lateralization  
3 bias is reflected (1) anatomically, by a majority of crossed cortico-spinal tract (CST)  
4 projections (Hicks & D'Amato, 1975), (2) electrophysiologically, by a predominance of  
5 contralateral muscle recruitments by cortical stimulation (Kwan et al., 1978), (3)  
6 functionally, by contralateral deficits induced by cortical lesions (Passingham et al., 1983).  
7 However, lateralization of cortical control is incomplete, yet there is limited evidence on  
8 the functional significance of cortical ipsilateral regulation of movement (Montgomery et  
9 al., 2013). A minority of direct cortico-spinal projections are uncrossed (Vahlsing &  
10 Feringa, 1980). Ipsilateral impairments have been reported after unilateral cortical injury  
11 or transient interference (e.g., via transcranial magnetic stimulation) accompanied with  
12 increased cortical activity from the opposite hemisphere (Blasi et al., 2002; Chen, Gerloff,  
13 et al., 1997; Johansen-Berg et al., 2002; Jones et al., 1989; Kim et al., 2003; Marque et  
14 al., 1997; Yarosh et al., 2004). Nevertheless, the function of the ipsilateral motor cortex  
15 is unclear and its role in the recovery of motor control after injury remains controversial  
16 (Caramia et al., 2000; Chen, Cohen, et al., 1997; Dancause et al., 2006; Hallett, 2001;  
17 Hummel & Cohen, 2006; Jankowska & Edgley, 2006; Serrien et al., 2004; Stoeckel &  
18 Binkofski, 2010; Turton et al., 1996). It has been reported that the ipsilateral motor cortex  
19 regulates tasks involving bilateral movements (Ames & Churchland, 2019; Donchin et al.,  
20 1998). Imaging studies have shown that lower extremities movements and walking, which  
21 require efficient bilateral coordination, are associated with bilateral activity in primary  
22 sensorimotor cortices and supplementary motor areas (Miyai et al., 2001). Yet cortical  
23 dynamics underlying locomotion have been primarily studied in relation to contralateral  
24 kinematics (Bonizzato et al., 2018; Brown & Martinez, 2021; DiGiovanna et al., 2016; Yin  
25 et al., 2014). The relationship between cortical commands and locomotion has received  
26 attention in the last decades (Amboni et al., 2013). Recent studies have shown that not  
27 only the cortex proactively controls high-level and goal-oriented motor planning but it is  
28 also involved during stereotyped locomotion (Artoni et al., 2017). Nevertheless,  
29 demonstrations of functional hindlimb controllability by cortical networks are still lacking,  
30 especially with respect to ipsilateral cortical contribution.

31 In order to address this knowledge gap, we designed a behavioral neuromodulation  
32 framework to assess the gait-phase-specific effects of intracortical neurostimulation on  
33 ipsilateral hindlimb kinematics during locomotion. We evaluated the regulation of hindlimb  
34 trajectory and posture both in intact rats and after a unilateral hemisection SCI. This side-  
35 specific lesion preserves the majority of crossed projections from the ipsilateral cortex  
36 while maximizing the loss of direct efferences from the contralateral cortex. As early as  
37 one week after injury, different modalities of ipsilateral cortical neuroprosthetic stimulation  
38 immediately alleviated SCI-induced deficits, including lack of hindlimb support, weak  
39 hindlimb extension and flexion, and dragging.

40 Finally, by longitudinally acquiring chronic motor maps in awake rats, we sought to  
41 provide a parallel description of the time course of ipsilateral cortico-spinal transmission  
42 and spontaneous recovery of locomotor function after SCI.

43 Our functional causal approach to ipsilateral movement directly challenges the classical  
44 view whereby ipsilateral motor cortex control of movement is epiphenomenal and

1 functionally limited. Our work shows that the cortex has direct functional control of  
2 hindlimb motor synergies and that its action can reverse SCI locomotor deficits.

3

#### 4 **Results**

5 We designed cortical neurostimulation that unveiled the contribution of the motor cortex  
6 in controlling ipsilateral hindlimb movements. Our goal was to characterize whether the  
7 stimulation manipulated the ongoing locomotor output in intact conditions and alleviated  
8 motor deficits after hemiparesis induced by lateralized SCI. Phase-coherent intracortical  
9 stimulation was synchronized with gait phases such as the contralateral foot lift. The  
10 expected timing of the gait event was predicted by real-time processing of muscle activity  
11 (Bonizzato & Martinez, 2021). We induced selective unilateral hindlimb deficits with a  
12 thoracic lateral hemisection of the spinal cord (Brown & Martinez, 2019b). In this SCI  
13 model, the hindlimb on the side of the spinal lesion is transitory paralyzed due to the loss  
14 of main supraspinal inputs, but the ipsilesional cortex retains most of its crossed  
15 connections to the sublesional spinal circuits.

16 For the sake of clarity, throughout the manuscript, the terms “ipsilateral” and “ipsilesional”  
17 will only be used to indicate the left implanted motor cortex and left leg, which are located  
18 on the same side of the spinal hemisection. Conversely “contralateral” and  
19 “contralesional” will solely refer to the right cortex and right leg. In brief, left = ipsi-; right =  
20 contra-.

#### 21 *Phase-coherent stimulation in intact rats*

22 Online detection of muscle activation was used to predict gait events and consequently  
23 trigger stimulation through a 32-channel intracortical array implanted into the left motor  
24 cortex. Stimulation effects on locomotor behavior were evaluated in n=6 intact rats (Fig.  
25 1A). Gait modulation was timing-dependent: maximal effects were obtained for stimuli  
26 delivered during the preparation and early execution of the right swing and consisted of  
27 an increase in right hindlimb flexion (Fig. 1B). When the stimulation was delivered  
28 between the left contact and the right mid-swing (in ‘phase-coherence’ with foot lift  
29 (Bonizzato & Martinez, 2021)), right step height was increased ( $+129\pm 17\%$ ,  $p=8E-5$ ) and  
30 gait pattern modifications resulted in a right swing dominance ( $+25\pm 2\%$ ,  $p=5E-4$ ) and a  
31 left stance dominance ( $+9\pm 1\%$ ,  $p=6E-4$ , Fig. 1B).

32 While characterizing the effects of modulating phase-coherent stimulation amplitudes, we  
33 found no effects on posture (Fig. 1C) nor ipsilateral kinematics (Fig. 1D) for all of the intact  
34 rats. Nevertheless, stimulation modulated the walking duty cycle and contralateral swing  
35 kinematics. Right step height ( $+157\pm 13\%$ ,  $p=2E-5$ ), flexion velocity ( $+107\pm 21\%$ ,  $p=2E-4$ ),  
36 swing ( $30\pm 3\%$ ,  $p=2E-5$ ) and stance ( $14\pm 2\%$ ,  $p=4E-4$ ) asymmetry indexes increased  
37 linearly when increasing stimulation amplitudes ( $R^2=[79\pm 5, 78\pm 6, 80\pm 4, 73\pm 9]\%$ , Fig. 1E-  
38 F).

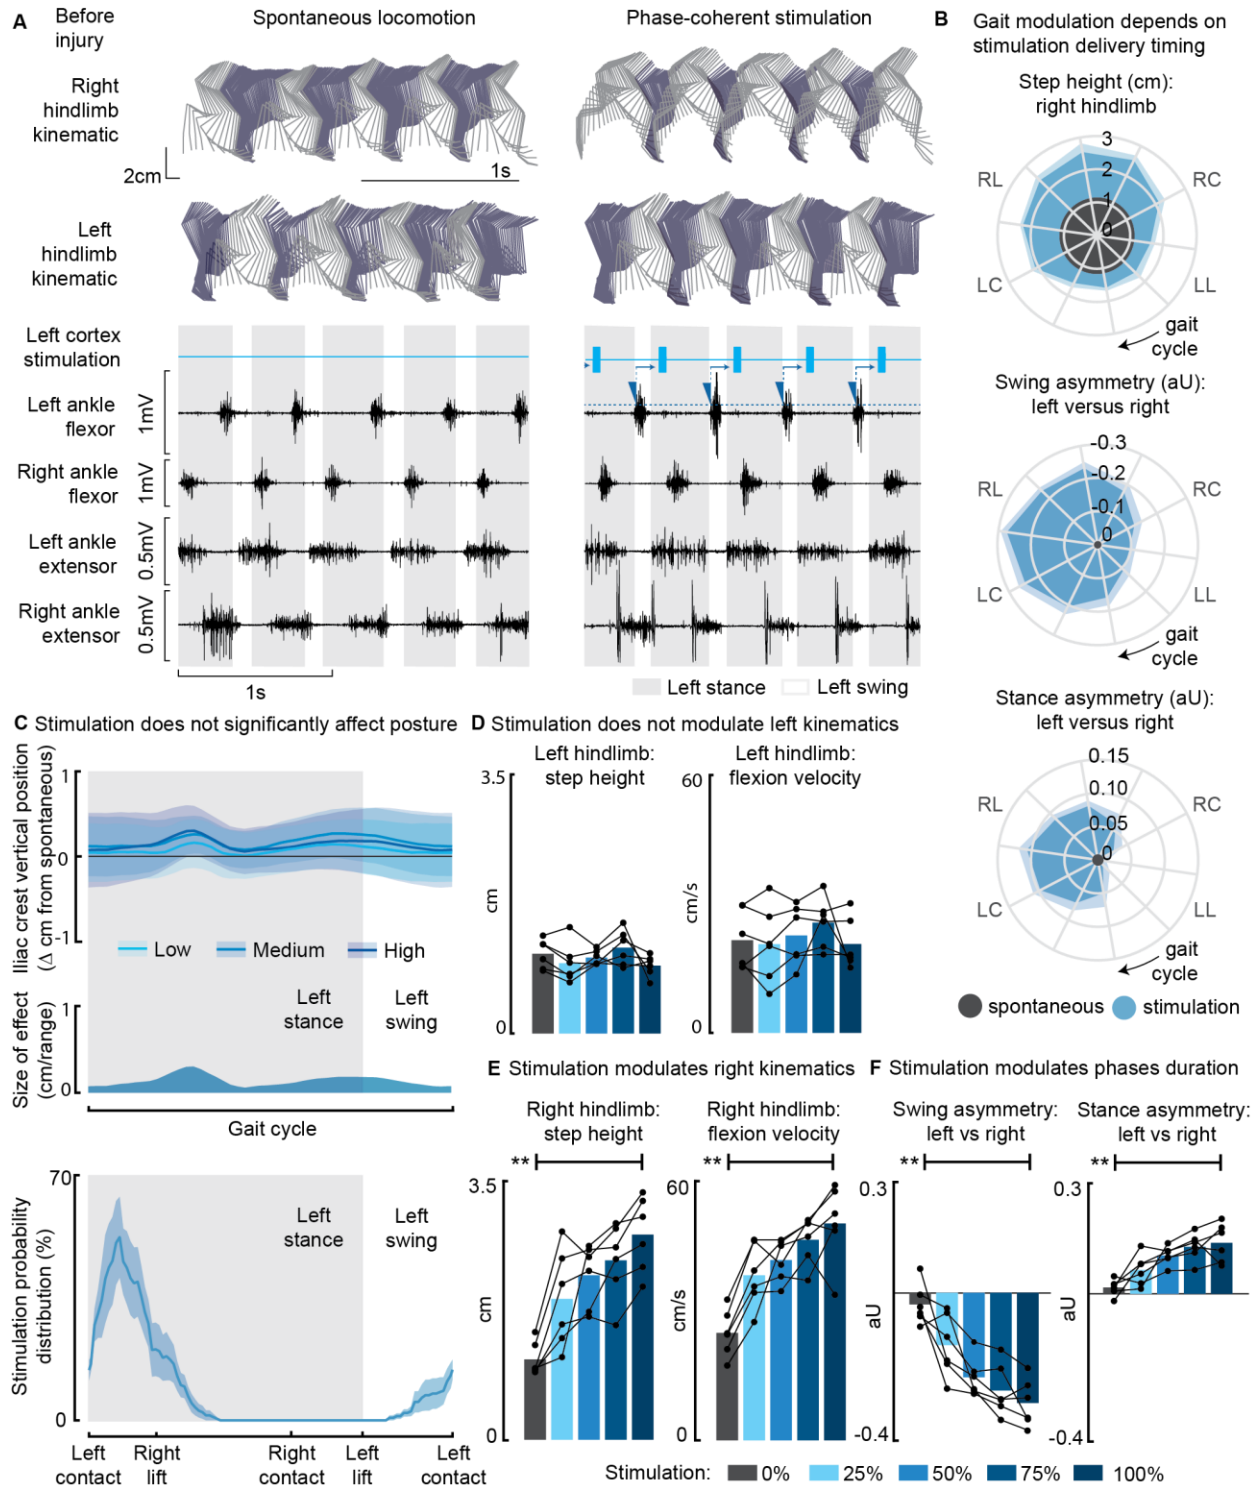

1  
2 **Fig. 1. Phase-coherent intracortical stimulation modulated contralateral kinematics in intact rats**  
3 **(n=6).** (A) Stick diagrams and electromyographic (EMG) activity during spontaneous locomotion and phase-  
4 coherent stimulation. The stimulation was triggered by left ankle flexor activation and was delivered during  
5 the late right stance (early left stance). (B) Polar plots showing contralateral step height in cm and gait  
6 phase asymmetries in arbitrary units (aU) for stimulation delivered with different timings along the whole  
7 gait cycle. Positive asymmetry index values refer to left-side dominance. For ease of reading, the radial  
8 axis of the swing symmetry plot has been inverted (outer values are negative). For the three polar plots,

1 the most effective kinematic neuromodulation corresponds to the largest radius. The gait cycle progresses  
2 clockwise, and the gait event references are reported as LC: left contact, RL: right lift, RC: right contact,  
3 and LL: left lift. **(C)** Analysis of the effects of cortical stimulation on the posture of rats (top) and experimental  
4 stimulation distribution (bottom). Posture is shown as the height of the left iliac crest during the gait cycle,  
5 which was not modulated by increasing cortical stimulation amplitude. **(D)** Characterization of ipsilateral  
6 kinematics. Left step height and flexion speed were not affected by increasing cortical stimulation  
7 amplitudes. **(E)** Modulation of contralateral kinematics. Right step height and flexion speed were linearly  
8 increased with greater stimulation amplitudes. **(F)** Modulation of bilateral gait phase duration. The absolute  
9 values of swing and stance asymmetry indexes were linearly increased with greater stimulation amplitudes.  
10 Positive asymmetry index values refer to left-side dominance. The data are represented as the mean  $\pm$   
11 SEM. \*\*  $p < 0.01$ .

12

### 13 *Phase-coherent stimulation of SCI rats*

14 After a left spinal hemisection, rats exhibited left hindlimb motor deficits, i.e. on the same  
15 side as the lesion. Approximately 1 week after injury (5 to 10 days depending on the injury  
16 severity), as soon as the animal had recovered alternated plantar hindlimb stepping,  
17 locomotor behavior was evaluated in  $n=7$  rats. The lack of left hindlimb support as well  
18 as weaker left flexion and extension induced asymmetries in the gait pattern (left swing  
19 dominance  $29\pm 4\%$   $p=2E-4$ , right stance dominance  $16\pm 3\%$   $p=1E-4$ , Fig. 2E). Phase-  
20 coherent stimulation of the left motor cortex (see scheme in Fig. 2A) proportionally  
21 enhanced contralateral step height. This effect was behaviorally expressed as a bilateral  
22 synergy, composed of a contralateral hindlimb flexion and an ipsilateral extension.  
23 Consequently, ipsilateral weight-bearing was intensified and prolonged, reversing the  
24 motor deficits and promoting the recovery of the balanced gait phase distribution between  
25 the left and right hindlimbs (Fig. 2B-C, Video 1). The maximal effects were obtained for  
26 stimuli delivered during the preparation and early execution of the right swing (as seen  
27 for the intact condition). These strongest effects included an increase in contralateral step  
28 height ( $+85\pm 18\%$ ,  $p=0.008$ ) as well as a counterbalance between swing ( $p=0.003$ ) and  
29 stance durations ( $p=0.006$ ) that reversed the asymmetry deficit up to  $116\pm 11\%$  and  
30  $115\pm 9\%$  respectively, compared to intact walking (Fig. 2D). When delivered during the  
31 late right or early left stance, stimulation amplitude linearly modulated right step height  
32 ( $+172\pm 30\%$ ,  $p=3E-6$ ) and flexion velocity ( $+115\pm 22\%$ ,  $p=4E-4$ ). In addition, the swing  
33 (deficit reversed up to  $123\pm 10\%$ ,  $p=4E-4$ ) and stance (deficit reversed up to  $125\pm 10\%$ ,  
34  $p=5E-4$ ) asymmetry indexes proportionally decreased (linear fits  $R^2=[85\pm 4, 86\pm 4, 80\pm 7,$   
35  $86\pm 5]\%$ , Fig. 2E).



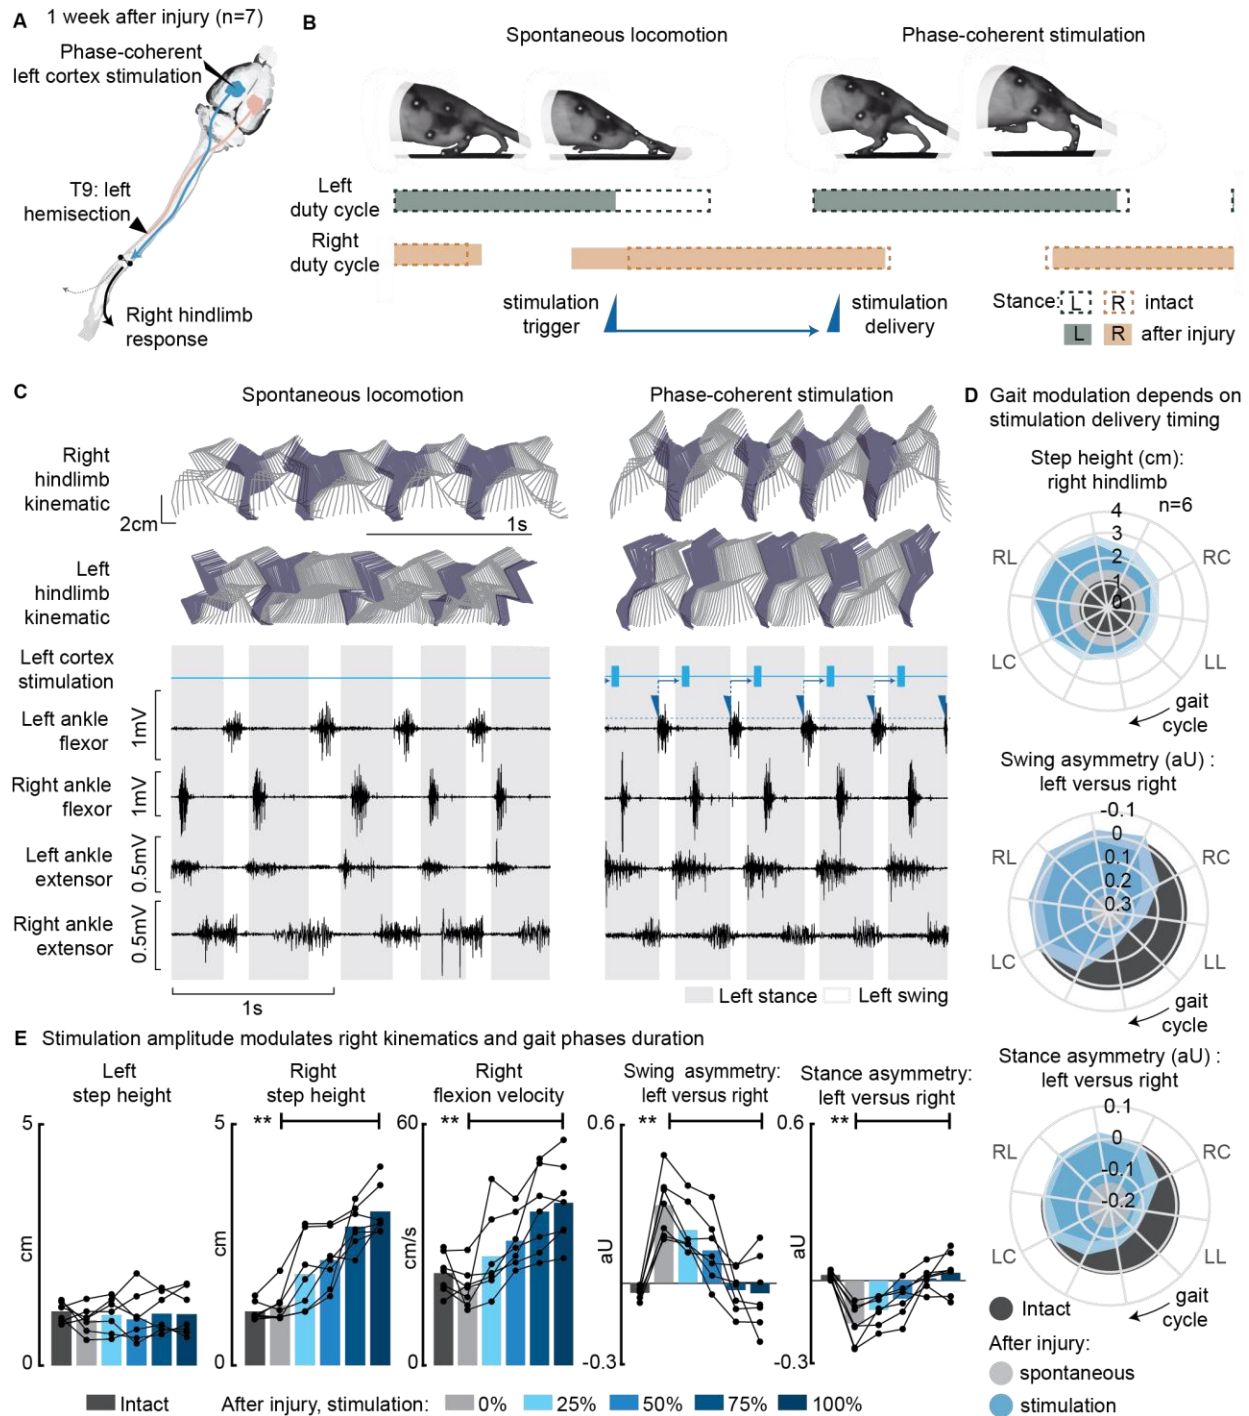

1

2 **Fig. 2. Phase-coherent intracortical stimulation alleviated locomotor deficits 1 week after injury**  
3 **(n=7).** (A) A schematic representation of the injury and neurostimulation model showing the thoracic left  
4 hemisection (T9) and left (ipsilesional) motor cortex stimulation. (B) A schematic representation of  
5 spontaneous locomotion and phase-coherent stimulation effects on postural changes, gait phase duration  
6 and alternation as well as stimulation trigger and delivery timings. The stimulation, triggered in  
7 correspondence with the left lift and delivered just before the right lift, resulted in a stronger right swing and  
8 a synchronous stronger left stance. (C) Stick diagrams and EMG activity during spontaneous locomotion  
9 and phase-coherent stimulation. The stimulation was triggered by left ankle flexor activation and was  
10 delivered during the late right stance (early left stance). (D) Polar plots showing contralateral step height

1 (cm) and gait phase asymmetry variations (aU) for stimulation delivered at different timings along the whole  
2 gait cycle. Positive asymmetry index values refer to left-side dominance. For ease of reading, the radial  
3 axis of the swing symmetry plot has been inverted (outer values are negative). For the three polar plots,  
4 the condition of strongest neuromodulation corresponded to the largest radius. Gait phase symmetry, highly  
5 affected during spontaneous locomotion, was recovered for stimulation delivered after the left contact and  
6 before the right contact. The gait cycle progresses clockwise, and the gait event references are reported  
7 as LC: left contact, RL: right lift, RC: right contact, and LL: left lift. **(E)** The contralateral kinematics and gait  
8 phase durations were linearly modulated with increasing stimulation amplitudes. Positive asymmetry index  
9 values refer to left-side dominance. Phase-coherent stimulation generated an increase in the step height  
10 and flexion speed of the right hindlimb and mediated the recovery of the physiological symmetry between  
11 the left and right swing and stance phases. The data are represented as the mean  $\pm$  SEM. \*\*  $p < 0.01$ .  
12 See Fig. S1 for additional details about the rats' hemisection profiles.

13

14 We then assessed the effects of phase-coherent stimulation on muscle activity (Fig. 3A).  
15 The ipsilesional ankle extensor was remarkably affected during spontaneous locomotion  
16 after the injury ( $-72\pm 4\%$  burst duration  $p=0.007$ ,  $-92\pm 2\%$  total activation  $p=0.007$ , with  
17 respect to intact conditions, Fig. 3B). Phase-coherent stimulation reinstated the  
18 contribution from this muscle, increasing burst duration ( $90\pm 18\%$  of the deficit,  $p=0.004$ ,  
19 Fig. 3B) and total activation ( $56\pm 13\%$  of the deficit,  $p=0.004$ , Fig. 3B) linearly with the  
20 injected stimulus amplitude ( $R^2=[84\pm 7, 84\pm 10]\%$ ). After injury, rats displayed low posture  
21 caused by the loss of weight acceptance on their left hindlimb. Postural deficits depended  
22 on the SCI severity (Fig. 4A). We found that during the recovery process, postural  
23 compensation occurred, culminating in an exceedingly elevated posture in chronic rats  
24 (Fig. 4B). Phase-coherent stimulation, delivered in the early left stance, immediately  
25 alleviated postural deficits 1 week after injury and the iliac crest height proportionally  
26 increased with greater stimulation amplitudes ( $p=0.03$ ,  $R^2=76\pm 9\%$ , Fig. 4C).

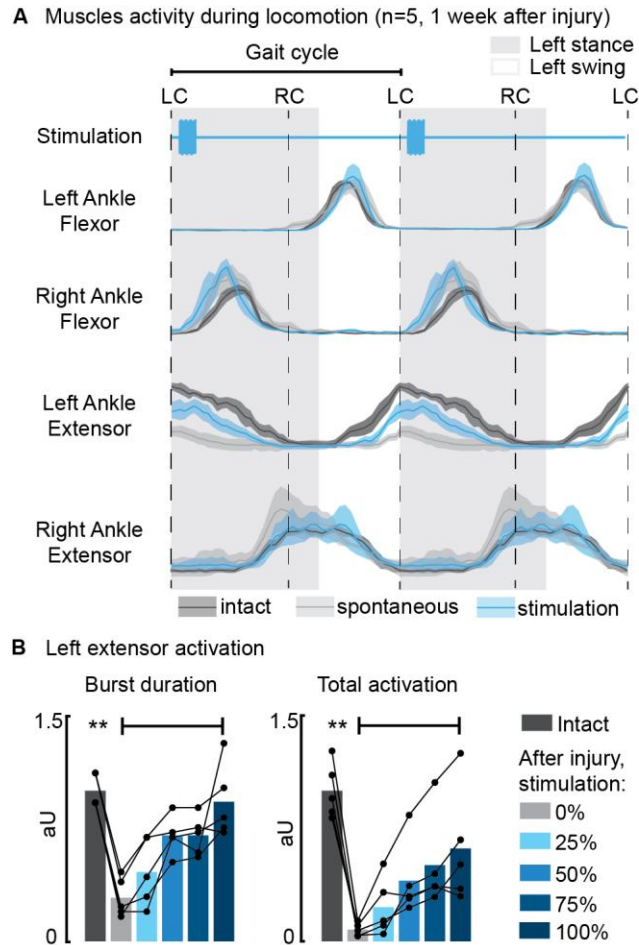

2 **Fig. 3. Phase-coherent intracortical stimulation reinstated left extension muscle activity 1 week after**  
3 **injury (n=5 muscles from 7 rats).** (A) EMG envelopes during spontaneous locomotion before and after  
4 injury as well as phase-coherent stimulation after injury. Activities of the left and right ankle flexor (tibialis  
5 anterior) and left and right ankle extensor (medial gastrocnemius). The gait event references are reported  
6 as LC: left contact, RC: right contact. (B) Left medial gastrocnemius activity was modulated by the  
7 stimulation. The burst duration and the level of muscle activation were linearly increased with greater  
8 stimulation amplitudes. The data are represented as the mean  $\pm$  SEM. \*\*  $p < 0.01$ .  
9 See Fig. S1 for additional details about the rats' hemisection profiles.



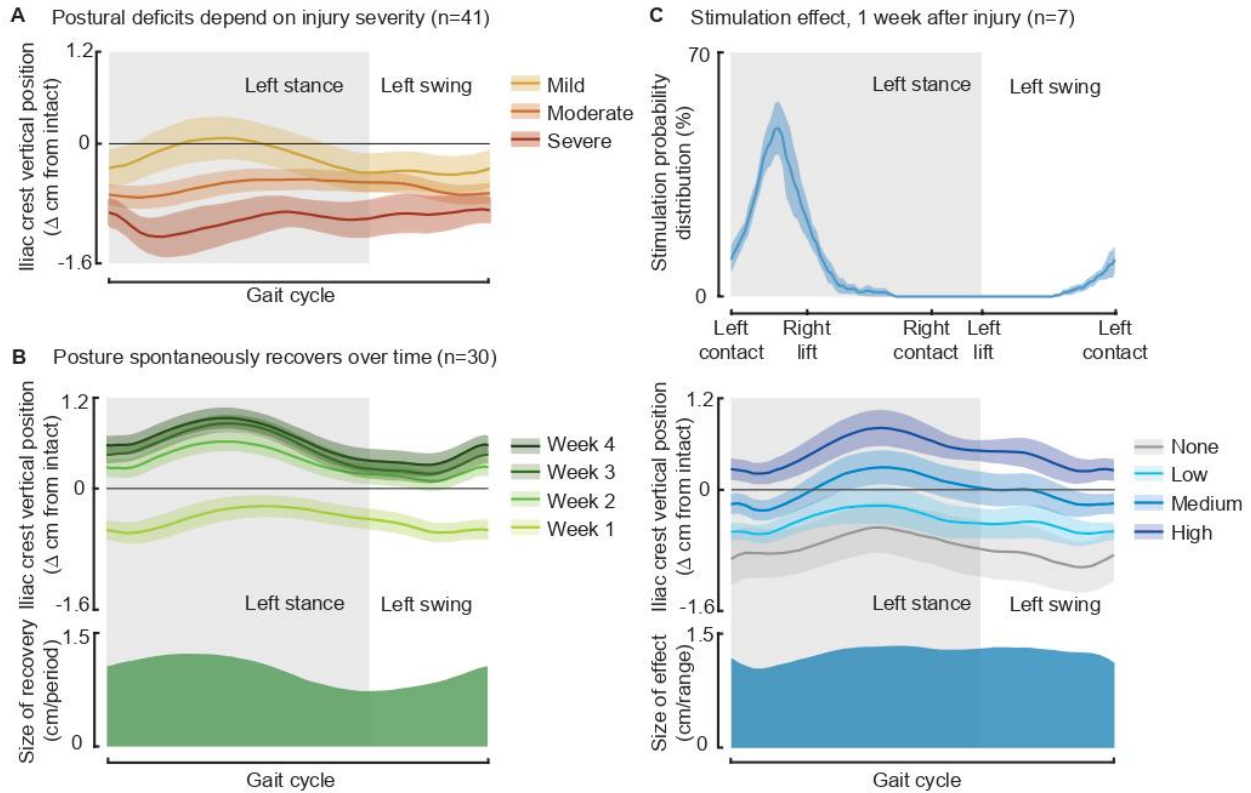

1  
2 **Fig. 4. Phase-coherent stimulation improved posture 1 week after injury.** Posture is shown as the  
3 height of the left iliac crest during locomotion with respect to the spontaneous condition before injury. The  
4 data are represented as the mean  $\pm$  SEM. **(A)** Postural deficits depend on injury severity. Rats with severe  
5 SCI exhibit a weaker posture 1 week after injury. **(B)** Variation over 1 month of spontaneous recovery.  
6 Posture is raised and overcompensated. **(C)** Effect of phase-coherent stimulation 1 week after injury.  
7 Posture is increasingly raised with greater stimulation amplitudes.

1 *Awake motor maps*

2 In n=12 awake rats, we collected ipsilesional cortical maps, measuring cortical  
3 transmission to both hindlimbs for 8 weeks following SCI (Fig. 5A). The lesion initially  
4 decreased corticospinal transmission on both sides: 5 days after injury the ipsilateral (left  
5 cortex to left hindlimb) and contralateral (left cortex to right hindlimb) transmissions were  
6 decreased by  $-90\pm 7\%$  and  $-53\pm 13\%$  ( $p=[2 \text{ E-}4, 3 \text{ E-}4]$ , Fig. 5B), respectively. The map  
7 size substantially increased 2 weeks after injury ( $+238\pm 28\%$   $p=1\text{E-}4$ , Fig. 5B). Over time,  
8 the representation of bilateral hindlimb movements significantly increased compared to  
9 the intact condition ( $+124\pm 30\%$ ,  $p=0.005$ , Fig. 5B).

10 The upregulation of cortical transmission and postural changes during spontaneous  
11 locomotion were mostly expressed within the same timeframe, specifically 1 to 2 weeks  
12 after SCI (Fig.5A-D). Between weeks 1 and 2,  $91\pm 22\%$  of the overall postural correction  
13 (Fig. 4B, 5C) and  $71\pm 2\%$  of the overall motor score recovery occurred (Fig. 5D).  $83\pm 7\%$   
14 of the ipsilateral map size post-lesional increment took place within the same time interval  
15 (Fig. 5B). Nevertheless, we found that motor map development did not correlate with  
16 functional motor recovery across subjects (Fig. 5E-G).

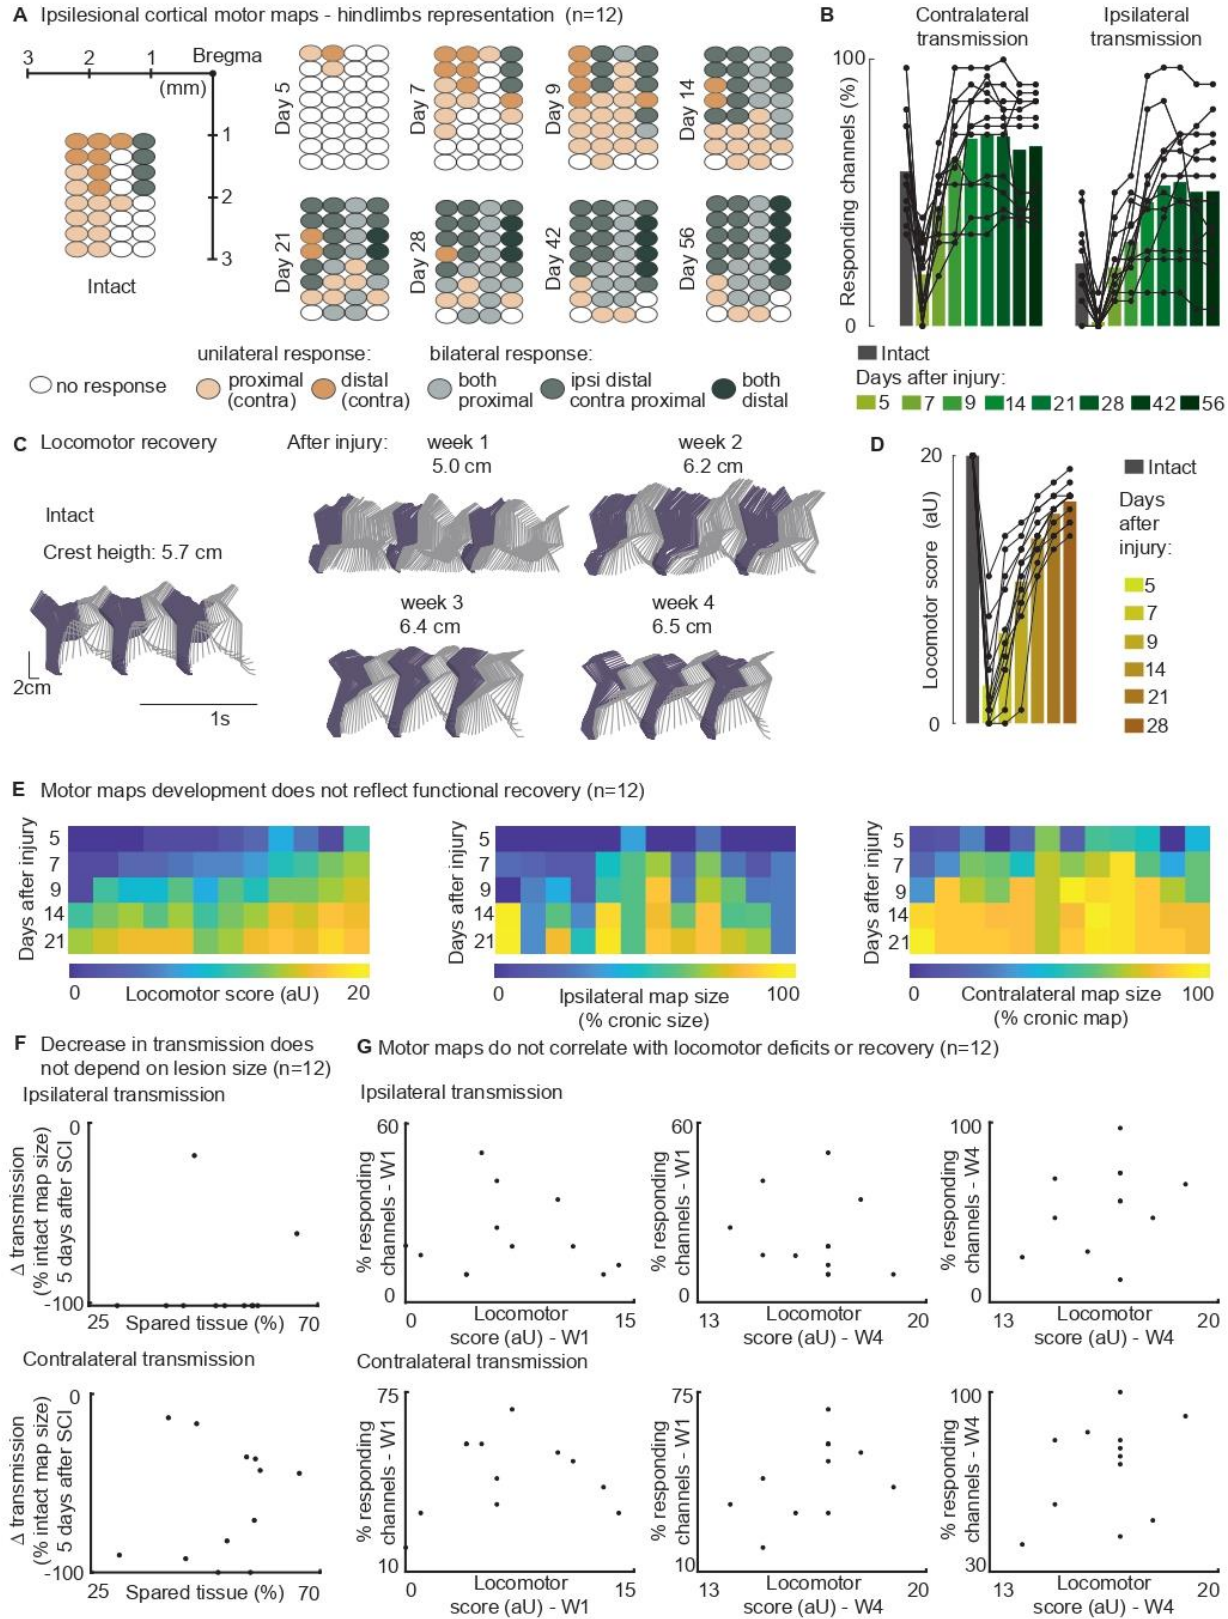

1

2 **Fig. 5. Ipsilateral motor representation of the affected hindlimb was increased in the ipsilesional**  
 3 **motor cortex after lateralized SCI but does not reflect functional recovery (n=12). (A) Awake cortical**

1 motor map representation before injury and up to 2 months after injury. The responding channels were  
2 identified by the rule of majority voting (a site response in at least  $n=6$  rats out of 12). Bilateral representation  
3 of hindlimb movements increases over time compared to the intact condition. **(B)** Quantification of  
4 responding channels from the intact condition and up to 2 months after injury. **(C)** Stick diagrams from  
5 treadmill locomotion and iliac crest height before injury and during the first 4 weeks after injury. **(D)**  
6 Quantification of locomotor score from the intact condition and up to 1 month after injury. **(E)** Cortical  
7 transmission and locomotor performance. An increase in map size did not correlate with motor recovery.  
8 **(F)** Lack of correlation between map size and lesion size 5 days after injury. An ipsilateral and contralateral  
9 decrease in transmission does not parallel the spared tissue at the lesion epicenter. **(G)** Lack of correlation  
10 between map size and locomotor score. Time points are reported as W1: week 1 and W4: week 4. Ipsilateral  
11 and contralateral transmission does not parallel the motor deficit, predict long-term performance nor reflect  
12 recovery. Bars: mean of individual data points.

13

#### 14 *Ipsilateral neuromodulation of hindlimb flexion*

15 Cortical control of hindlimb movements in behaving rats has been primarily associated  
16 with contralateral limb flexion and elevation (Bonizzato & Martinez, 2021; Bonizzato et  
17 al., 2018; DiGiovanna et al., 2016; Rigosa et al., 2015). Our results presented thus far  
18 show that for all tested animals, extensor synergies in the ipsilesional hindlimb emerged  
19 within the framework of a contralateral hindlimb flexion. Nevertheless, in  $n=2$  rats, an  
20 additional distinct motor response was represented in a medial area of the motor cortex.  
21 In these rats, that were tested 2 weeks after SCI, stimulation of specific array sites  
22 preferentially evoked ipsilateral flexor responses (Fig. 6, rat#1: 3 channels with  $271\pm36\%$   
23 ipsilateral dominance, rest of responding channels  $43\pm4\%$ ,  $p=0.006$ , rat#2: 6 channels  
24  $452\pm87\%$ , all others  $18\pm4\%$ ,  $p=5E-4$ , Fig. 6D). The site with the highest ipsilateral  
25 dominance (rat#1:  $327\pm109\%$ , rat#2:  $692\pm84\%$ ) was chosen to test the modulation of  
26 ipsilateral swing trajectories (Fig. 6B). Stimuli delivered during the late left stance resulted  
27 in kinematic modulation: step height ( $+133\pm18, +99\pm23\%$ ,  $p=[1E-4, 0.001]$ ) and flexion  
28 velocity ( $+46\pm19, +101\pm19\%$ ,  $p=[0.01, 1E-4]$ ) increased linearly (rat#1  $R^2=[90, 91]\%$ , rat#2  
29  $R^2=[95, 86]\%$ ) with greater stimulation amplitudes (Fig. 6E, Video 2). As a result, dragging  
30 was immediately alleviated ( $-46\pm6, -100\%$ ,  $p=[1E-6, 7E-4]$ ). This result was unique for ipsi-  
31 dominant cortical sites; no other tested electrode produced ipsilateral flexion facilitation  
32 (see Fig. 2E). The sites produced a similar functional effect as contralesional cortical  
33 stimulation (Bonizzato & Martinez, 2021).



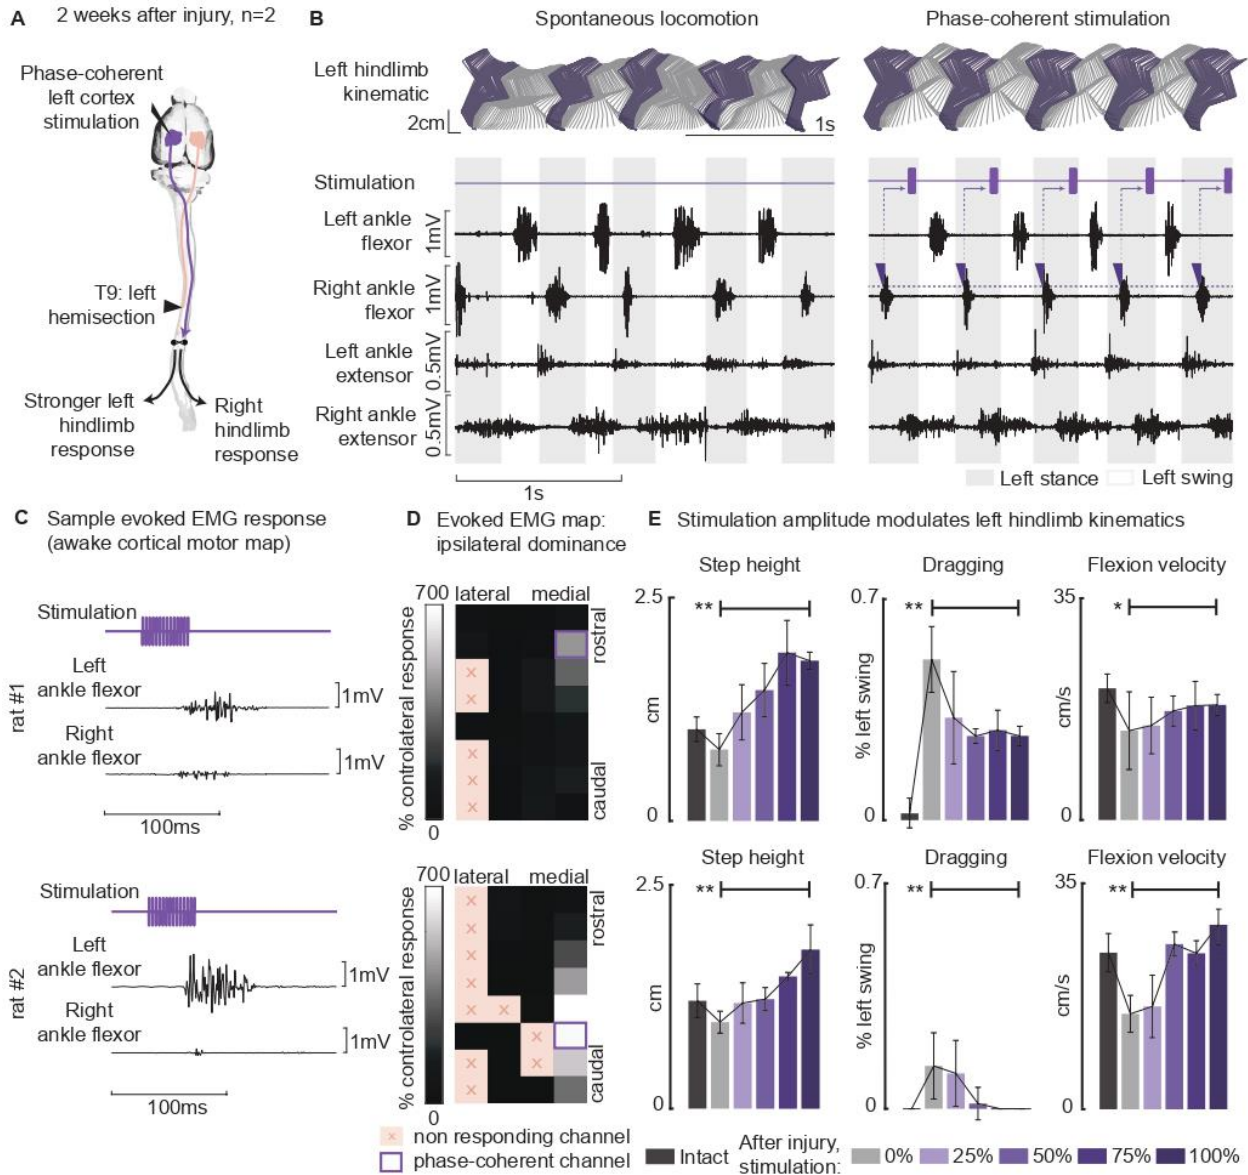



1 **Cortical neuromodulation of hindlimb alternated rhythms**

2 We next asked whether long-train intracortical stimulation in awake resting rats can evoke  
 3 complex multi-modal motor responses (Graziano et al., 2002) and whether the effects on  
 4 hindlimb movement are bilateral. The stimulation was 250ms in duration, approximately  
 5 the time scale of locomotor movement preparation and initiation (Bonizzato et al., 2021).  
 6 In n=6 intact rats, we found that long-train stimulation of one motor cortex evoked  
 7 locomotor-like rhythms (Fig. 7A-B, Video 3), expressed by bilateral alternated whole-leg  
 8 movements. We then determined that one week after unilateral hemisection SCI, long-  
 9 train stimulation of the ipsilesional cortex failed to evoke bilateral rhythms in half of the  
 10 tested rats. These rats exhibited a more severe injury phenotype, which was also  
 11 confirmed by lower ladder crossing performance. Bilateral alternated locomotor-like  
 12 rhythms returned by week 2 or 3 in all rats (Fig. 7C). The remaining three less severe rats  
 13 displayed bilateral alternated hindlimb rhythms when receiving ipsilesional cortical  
 14 stimulation as early as one week after injury (Fig. 7D). Classically, stimulation studies of  
 15 cortical control and recovery of movement are often performed under ketamine sedation  
 16 (Brown & Martinez, 2018; Nudo et al., 1996). To visualize the well-characterized absence  
 17 of rhythmic hindlimb activity after ketamine sedation, n=1 intact rat was also tested and  
 18 recorded before and after ketamine injection, confirming suppression of rhythmic hindlimb  
 19 responses (Fig. 7E).

20

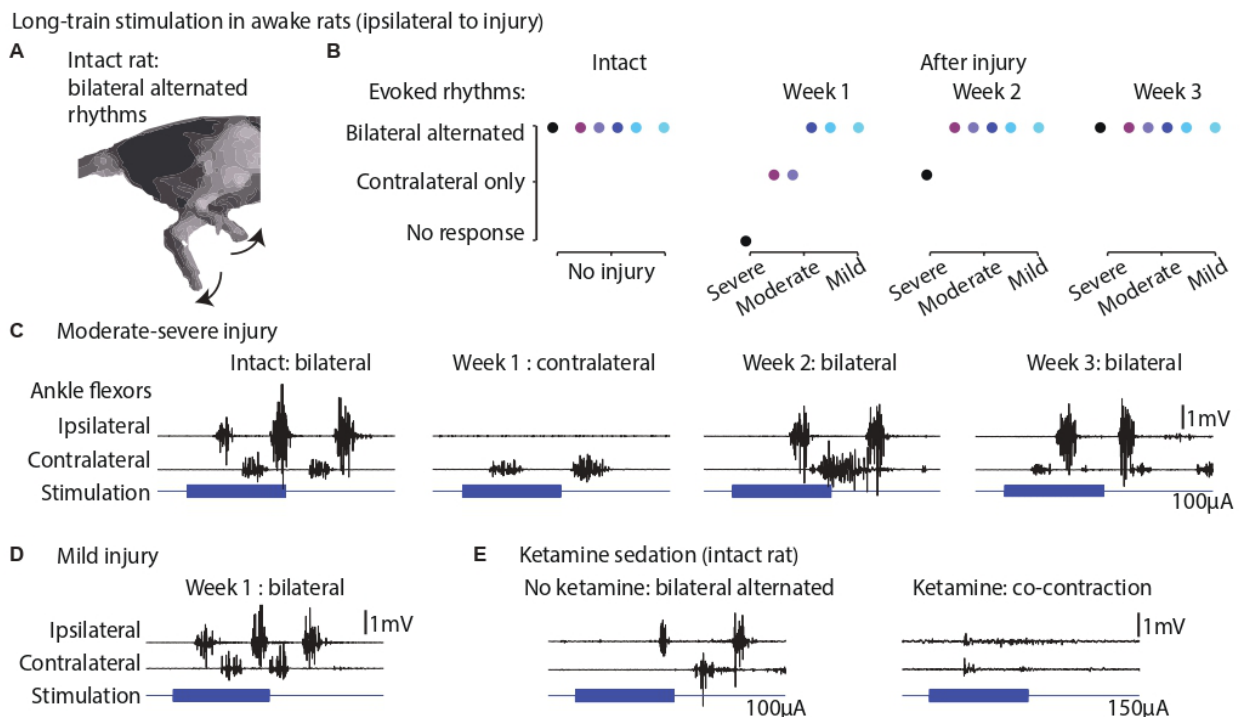

21

22 **Fig. 7. Long-train intracortical stimulation in awake rats generated alternated bilateral rhythms (n=6).**

23 **(A)** Schematic representation of the locomotor-like rhythmic movements evoked by long-train  
 24 (250ms) cortical stimulation. Evoked rhythms are characterized by alternated hindlimb movements. **(B)** In  
 25 all n=6 tested intact rats, stimulation of the left cortex generated bilateral alternated hindlimb rhythms.  
 26 After SCI, rats are sorted by injury severity, using their ladder score at week 1 for ranking. One week after

1 injury, long-train cortical stimulation failed to evoke bilateral alternated rhythms in half of the cohort. In two  
2 of these rats, contralateral rhythms were still present and bilateral alternated rhythms were recovered by  
3 week 2. In the most severe rat, contralateral-only rhythms were evoked on week 2 and bilateral alternated  
4 rhythms on week 3. For the remaining half of the cohort, long-train cortical stimulation recruited bilateral  
5 alternated rhythms at all tested time points. **(C)** Stimulus-synchronized ankle flexor EMG traces from n=1  
6 rat with a moderate-severe injury, showing loss (week 1) and following recovery (week 2-3) of ipsilateral  
7 evoked hindlimb rhythms. **(D)** Stimulus-synchronized EMG trace from n=1 rat with mild injury, showing  
8 that bilateral alternated evoked rhythms are preserved at week 1. **(E)** Stimulus-synchronized EMG trace  
9 from n=1 intact rat before and after ketamine sedation, showing transient loss of bilateral alternated  
10 rhythms.

11

12

## 13 **Discussion**

### 14 *A cortical neuroprosthesis facilitates the control of ipsilateral hindlimb extension*

15 In this study, we demonstrated that after a lateralized SCI, the ipsilesional cortex (with  
16 most of its crossed efferences preserved) exhibited an increased contribution in  
17 controlling bilateral hindlimb movements. An ipsilateral cortical neuroprosthesis alleviated  
18 SCI-induced locomotor and postural deficits across different levels of injury severity (Fig.  
19 S1, Table 1). The lateralized lesion model and phase-coherent cortical stimulation  
20 revealed functional ipsilateral motor control. The evoked movement was characterized by  
21 flexion of the contralateral hindlimb with a synchronous extension of the ipsilateral  
22 hindlimb. Thus, the ipsilesional motor cortex can activate bilateral lumbar synergistic  
23 networks through descending connections spared from the injury. We suggest that the  
24 acute expression of this bilateral synergy (1 week after injury) is compatible with adaptive  
25 or compensatory upregulation of pre-existing functional networks after SCI. Rapid onset  
26 of postural compensation is also displayed behaviorally by rats during the same  
27 timeframe (Fig. 4B). Although this outcome may reflect the participation of several  
28 supralesional networks, lateralized injuries capitalize the role of the ipsilesional cortex in  
29 voluntary postural and weight-bearing adjustments. We propose that this phenomenon  
30 reflects a need to preserve the functional role of the motor cortex in modulating  
31 contralateral step height during locomotion. In the absence of appropriate support from  
32 the opposite hindlimb due to the injury, the ability to elevate the foot would be  
33 compromised. Therefore, cortex-driven descending pathways may increase the  
34 excitatory transmission to ipsilesional extensor networks, thus recovering appropriate  
35 hindlimb support and retrieving precise functional control of contralateral step height.

### 36 *Ipsilesional motor map progression after SCI did not correlate with spontaneous recovery*

37 After a unilateral cortical injury, plastic changes are observed in the opposite hemisphere  
38 (Axelson et al., 2013; Rehme et al., 2012; Shimizu et al., 2002; Strens et al., 2003; Witte  
39 et al., 2000). Laterally unbalanced SCI induces asymmetric activity changes in the  
40 contralesional and ipsilesional cortex, which may participate in functional recovery or  
41 compensation mechanisms (Bonizzato & Martinez, 2021; Brown & Martinez, 2018; Brown  
42 & Martinez, 2019a, 2021). We tracked the progression of motor representation of both  
43 hindlimbs in the ipsilesional motor cortex and found that in all animals, cortico-spinal

1 transmission significantly decreased after injury (Fig. 5B), independently from the subject-  
2 specific size of the injury (Fig. 5F). This finding is consistent with a major loss of  
3 connectivity, including damage to the uncrossed ventral CST (Weidner et al., 2001) and  
4 ipsilateral cortico-reticulo-spinal transmission (Bonizzato & Martinez, 2021). The loss of  
5 excitability was quickly recovered within 2 weeks (Fig. 5B), with a return of cortico-spinal  
6 transmission consistent with the upregulation of the descending pathways spared from  
7 the injury. However, the subject-specific evolution of cortical motor maps in this timeframe  
8 did not correlate with the behaviorally expressed motor performance (Fig. 5G).  
9 Conversely, we previously showed that contralesional cortical map changes tightly  
10 correlated with locomotor recovery (Bonizzato & Martinez, 2021). Comparison of these  
11 two results suggested that recovery of hindlimb movement after SCI may be more tightly  
12 connected to changes in the contralateral cortical motor representation rather than the  
13 ipsilateral cortical motor representation, even in fully lateralized thoracic injuries, which  
14 disproportionately affect the crossed projections from the contralateral cortex.  
15 Nevertheless, since acute cortical inactivation 3 weeks after SCI immediately reinstated  
16 bilateral hindlimb deficits, we previously concluded that the ipsilesional cortex also  
17 supports locomotor recovery in this SCI model (Brown & Martinez, 2018). These  
18 combined results suggested that, although not a precise predictor of motor performance,  
19 the return of bilateral cortico-spinal transmission from the ipsilesional cortex after SCI is  
20 an important excitatory drive that supports bilateral skilled hindlimb movement.

#### 21 *A cortical neuroprosthesis facilitates the control of ipsilateral hindlimb flexion*

22 We demonstrated a distinctive case of ipsilateral flexion modulation, which requires  
23 specific consideration. In two rats, phase-coherent stimulation of a cortical sub-region  
24 predominantly modulated the ipsilateral hindlimb flexion. The localization of the specific  
25 channels to the most medial region of the array (Fig. 6D), hence closest to the  
26 interhemispheric fissure, may suggest the involvement of transcallosal interactions in  
27 mediating transmission of the cortical command generated in the ipsilateral cortex (Brus-  
28 Ramer et al., 2009). However, the hemisection (particularly severe in one of the two  
29 animals, see Table S1) should exclude a contribution from the interrupted left CST.  
30 Further experiments are required to understand the mechanism(s) underlying this  
31 unconventional instance of cortical control of movement. A compelling research question  
32 arising from these results is whether similar findings can be found in the primate motor  
33 cortex.

#### 34 *A cortical neuroprosthesis unveiled ipsilateral functional control of movement*

35 Multiple hypotheses have been proposed to explain ipsilateral motor cortical activity  
36 during movement (Ames & Churchland, 2019), including the following: (1) an abstract  
37 limb-independent representation of movement (Porro et al., 2000), (2) an efference copy  
38 of signals generated by the contralateral cortex (Ganguly et al., 2009), (3) uncrossed  
39 descending connectivity (Weidner et al., 2001), (4) bilateral termination of crossed  
40 descending connectivity (Rosenzweig et al., 2009) and (5) distribution of motor cortical  
41 computations across the two hemispheres (Ames & Churchland, 2019; Li et al., 2016).  
42 Our results contribute to this debate and establish specific causal links in brain-behavior  
43 interactions (Silvanto & Pascual-Leone, 2012). We employed cortical stimulation that was  
44 delivered during endogenous execution of movements and provided evidence of cortical-

1 mediated control of functional, complex, and diverse ipsilateral movements in the rat. Our  
2 results do not support the hypothesis that ipsilateral motor cortex participation in  
3 movement is solely epiphenomenal, such as a purely abstract representation or a lone  
4 efference copy. Furthermore, lateralized injury completely abolished all uncrossed  
5 descending connectivity in a subset of animals, whereas the described effect persisted.  
6 Thus, our results are consistent with the integration of the latter two proposed  
7 explanations described above: crossed cortical descending projections (either direct or  
8 indirect through brainstem relays (Asboth et al., 2018)) display a high degree of bilaterality  
9 and complexity in both rats (Bonizzato & Martinez, 2021) and primates (Rosenzweig et  
10 al., 2009), a feature which underlies an equally complex bilateral distribution of motor  
11 cortical computations (Aizawa et al., 1990). This hypothesis is further supported by the  
12 finding that ipsilesional cortical inactivation in the rat immediately reinstates leg control  
13 deficits 3 weeks after hemisection (Brown & Martinez, 2018).

#### 14 *Long-train cortical stimulation recruits spinal locomotor circuits*

15 The short duration of the stimulus train used during phase-coherent stimulation  
16 experiments can limit the display of complete, coordinated movements which may be  
17 evoked and modulated by cortical networks when activated for a time scale of hundreds  
18 of milliseconds (Graziano et al., 2002), such as what happens endogenously when  
19 movement is initiated (Bonizzato et al., 2021). We used long-train cortical stimulation in  
20 resting animals to unfold a complex generation of locomotor-like rhythms. The evoked  
21 movements were highly coordinated bilaterally across the entire hindlimb system. We  
22 interpret the apparent discrepancy between the selective outcomes of short duration  
23 stimulation, which recruits a predictable unilateral flexion or extension pattern, with the  
24 alternate recruitment of both flexion and extension within each leg (Video 3) produced by  
25 long stimulation, in light of the different excitability of spinal circuits within the dissimilar  
26 contexts of walking or being elevated with no contact to the ground. Afferent inputs are  
27 critical for spinal locomotion, nevertheless here we show that unilateral cortical drive can  
28 recruit the spinal locomotor circuits evoking alternated “air-stepping” in awake rats in  
29 absence of cutaneous interaction with a ground surface. We also show that thoracic  
30 hemisection can initially restrict the effects of cortical excitation to the unilateral  
31 generation of spinal rhythms, suggesting that cortical projections jointly recruit  
32 independent (i.e., side-specific (Grillner & Wallen, 1985)) rhythm-generating spinal units.  
33 Recovery of bilateral alternated rhythms within 2-3 weeks after hemisection suggests  
34 changes within the spinal circuitry below the lesion, possibly mediated by the persistent  
35 interaction between commissural interneurons and efferences responsible for cortico-  
36 spinal transmission (Gossard et al., 2015; Martinez et al., 2011). The role of supraspinal  
37 drive on spinal locomotor circuits has been previously discussed with respect to “fictive”  
38 locomotion (decerebrate) preparations. In the cat, pyramidal stimulation was found to  
39 reset the locomotor rhythm by initiating bursts of activity in either extensor (Leblond et al.,  
40 2001) or flexor muscles (Orlovsky, 1972), but repetitive burst stimulation was required to  
41 temporize cycles into a structured rhythm, which falls short to the rhythms-evoking  
42 capacity we demonstrated through long-train cortical stimulation in awake rats.

#### 43 *Ipsilateral cortical control of movement*

1 In summary, our results show that short phasic cortical stimulation is mediated by a gating  
2 system allowing kinematic expression of selective (flexion/extension) cortical commands  
3 to both hindlimbs in the correct phase of the locomotor cycle; long cortical stimulation  
4 triggers spinal locomotor circuits, transforming unilateral cortical neuromodulation into  
5 bilateral alternated output. Hence, the rodent motor cortex displays a complex executive  
6 relationship with spinal networks which mediate cortical initiation and modulation of  
7 ongoing movement, overall allowing a remarkable bilateral efferent transmission, which  
8 coherently integrates and regulates spinal states. Movement is generated by distributed  
9 cortical, subcortical, brainstem, and spinal networks, each of which is strongly functionally  
10 interconnected with contralateral counterparts. Multiple cortical networks involved in the  
11 generation of movement have been shown to become activated in a limb-independent  
12 mechanism. In the dorsal stream of visuomotor processing, the posterior parietal cortex  
13 contributes to grasping (Kermadi, 2000) or locomotor movements such as obstacle  
14 avoidance (Andujar et al., 2009). During the execution of these tasks, neurons responding  
15 to both left and right limb movement predominate. Premotor cortical areas also harbor  
16 neurons that become activated during ipsilateral movement (Cisek et al., 2003; Kermadi,  
17 2000; Michaels & Scherberger, 2018). Our results indicated that this bilaterality is not  
18 extinguished in the cortical line of sensorimotor integration. Instead, it is at least  
19 selectively preserved in the functional network properties of the ultimate cortical actuator  
20 of movement, the primary motor cortex.

### 21 *Cortical neuroprostheses*

22 These results, beyond providing new evidence of complex ipsilateral control of movement  
23 in mammals, have potential translational implications for the future development of  
24 neuroprosthetic solutions. Since cortical stimulation immediately alleviated motor deficits  
25 in rats, it may also promote more efficient movement execution in individuals with  
26 lateralized SCI or hemiparesis due to cortical or subcortical stroke. Improved motor  
27 performance may lead to a broad range of potential benefits, including better and more  
28 sustained access to activity-based training. A limitation of this potential treatment is the  
29 invasive nature of the intracortical interface utilized in the rats. Less invasive solutions  
30 exist including transcranial magnetic stimulation, which requires further targeted research  
31 since (1) it has not yet been tested as a 'priming' agent for movement in the subacute  
32 phases of neurotrauma (Smith & Stinear, 2016) and (2) it is usually intended as an  
33 inhibitory agent for the non-lesioned cortex (Nowak et al., 2009), in line with the  
34 interhemispheric inhibition stroke model. A clear trade-off between invasiveness and  
35 efficacy of neurostimulation techniques needs to be established to determine which set  
36 of neurostimulation methods holds the potential to improve the generation of cortical  
37 motor commands in individuals with neurotrauma.



## 1 **Materials and Methods**

### 2 *Experimental model and subject details*

#### 3 Animals

4 All procedures followed the guidelines of the Canadian Council of Animal Care and were  
5 approved by the Comité de déontologie de l'expérimentation sur les animaux (CDEA,  
6 animal ethics committee) at Université de Montréal. A total of n=16 (see Table S1) female  
7 Long-Evans rats (Charles River Laboratories, line 006, 270-350 g) were used in this  
8 study. Additional rats (n=25) were added to analyze spontaneous postural changes after  
9 injury (Fig. 4A-B). After a period of acclimatization and handling habituation, rats were  
10 trained to walk on a motorized treadmill with positive reinforcement (food). The rats were  
11 housed in a group (n=3) before surgery and were housed individually after implantation.  
12 Blinding did not apply since kinematic analysis was automatically performed by  
13 DeepLabCut. The output was curated to avoid detection mistakes, and corrections  
14 involved less than 0.5% of the conditioned points.

#### 15 Study design

16 The number of animals used in this study was determined based on power analysis. The  
17 objective of this study was to maximize the extension/stance phase and promote the  
18 weight support recovery of the affected hindlimb after unilateral SCI. At the beginning of  
19 the study, we ran a pilot experiment with two animals and found that ipsilesional phase-  
20 coherent intracortical stimulation increased the contralateral stance phase duration by >  
21 80% of the intra-subject variability. Under this condition, power analysis estimated a 97%  
22 probability of achieving significant results ( $\alpha=0.05$ ) with n=5 subjects and a 99%  
23 probability with n=6 subjects (one-sided, paired t-test). We characterized n=6 intact  
24 animals. For SCI subjects, we increased the sample size to n=7 to allow sufficient power  
25 for electromyographic (EMG) investigation. Starting with recordings from n=7 rats and  
26 excluding poor quality signals, we obtained an EMG analysis with n=5 animals for each  
27 muscle.

#### 28 *Method details*

#### 29 Surgical procedures

30 All surgical procedures were performed under isoflurane general anesthesia. Lidocaine  
31 (2%) was delivered at the incision sites. Analgesic (buprenorphine) and antibiotic (Baytril)  
32 were administrated for 3-4 days after surgery. In the first surgery, we implanted the EMG  
33 electrodes and the intracortical array. Differential EMG wires were inserted into the left  
34 and right tibialis anterior and medial gastrocnemius muscles. Common ground wires were  
35 subcutaneously placed around the torso. After a craniotomy and removal of the dura  
36 matter from the left motor cortex hindlimb area, a Tucker-Davis Technologies 32-channel  
37 array (8 rows, 4 columns, 1.125 x 1.75 mm) was inserted into the cortical layer V (1.5 mm  
38 depth) with the top-right site of the array positioned at coordinates [1.1 mm posterior,  
39 1.1 mm lateral] from bregma. The EMG connector and intracortical array were then  
40 embedded in dental acrylic and fixated on the head with four screws. During the second  
41 surgery, rats received SCI. A partial T9 laminectomy was performed and 2% lidocaine  
42 was used to lower spinal reflexes, followed by left spinal cord hemisection (Brown &  
43 Martinez, 2019b). In rats that were unable to micturate, their bladders were manually

1 expressed for a few days after injury, until they spontaneously regained control of  
2 micturition.

### 3 Behavioral assessments

4 The following three tasks were used to assess the motor performance of the rats: (1)  
5 ladder crossing, (2) open-field, and (3) treadmill. The ladder test was used to evaluate  
6 skilled locomotion. In this test, rats were recorded (100 frames/s) while crossing a  
7 horizontal ladder (130 cm long) with regularly spaced rungs (3 mm rungs spaced by 2  
8 cm). In each session, trials with only consecutive steps were analyzed and five trials per  
9 rat were averaged. Each trial consisted of approximately 10 steps. The scoring system  
10 was based on the foot fault score (Metz & Whishaw, 2002). At 7 days after lesion  
11 induction, the performance was used as a reference to classify the severity of the animal's  
12 injury. The injuries were classified based on the number of partial or correct paw  
13 placements on the rungs over the total number of steps (referred to as paw placements),  
14 Thus, the injuries were classified as: (1) mild (left hindlimb > 20% paw placement), (2)  
15 moderate (left hindlimb < 20% paw placement and right hindlimb > 75% paw placement)  
16 and (3) severe (bilateral deficit, right hindlimb < 75% paw placement). The open-field test  
17 was utilized to evaluate spontaneous overground locomotion. In this test, rats were  
18 recorded (30 frames/s) during spontaneous locomotion within a circular Plexiglas arena  
19 (96 cm diameter, 40 cm wall height) with an anti-skid floor. The locomotor score was  
20 assigned using the Martinez scale (Brown & Martinez, 2019b; Martinez et al., 2009). The  
21 treadmill task was used to evaluate stimulation effects. In this task, 10 consecutive steps  
22 were considered for each trial. The treadmill speed was 23 cm/s and kinematics were  
23 captured (119.2 Hz) with the use of six reflective markers identifying the iliac crest,  
24 trochanter, knee, fifth metatarsal and fourth toe tip. The posture of the rats was evaluated  
25 from the height of the iliac crest during the gait cycle and was compared to intact rats.  
26 The ladder and open-field scoring as well as kinematic analysis were performed offline.  
27 The kinematics were tracked with DeepLabCut (Mathis et al., 2018) and manually curated  
28 to avoid misdetections.

### 29 Awake motor maps

30 To evaluate motor evoked responses, the 32 channels of the cortical array were tested in  
31 awake animals. A 40 ms pulse train (330 Hz, biphasic, 200  $\mu$ s/phase) was delivered to  
32 each site and hindlimb responses were assessed visually while the animal was resting  
33 and held with trunk support. Starting with stimulation amplitudes of 100  $\mu$ A, the response  
34 type (proximal or distal) was assessed and the minimum amplitude evoking a visible  
35 twitch was then identified as the threshold value. A joint motor map from n=12 subjects  
36 was defined by majority voting (Fig. 5). In the case of n=2 rats, in which specific channels  
37 preferentially evoked ipsilateral motor responses, EMG signals were recorded during 10  
38 additional rounds of testing for all channels. After normalizing each muscle activity to  
39 spontaneous locomotion, we quantified the ipsilateral dominance of muscle activation as  
40 the ratio of the left and right tibialis anterior evoked responses.

### 41 Phase-coherent cortical stimulation

42 The phase-coherent neurostimulation strategy was previously presented in detail  
43 (Bonizzato & Martinez, 2021). The EMG activity was processed online during treadmill  
44 locomotion and a trigger event was detected when the signal crossed a manually selected  
45 activation threshold. A biphasic 40 ms train at 330 Hz was then delivered with a specific

1 delay. Among the 32 sites of the cortical array, the stimulation channel was chosen which  
2 evoked the strongest right hindlimb flexion (or left hindlimb flexion in the case of ipsilateral  
3 modulation) during motor maps assessment. For amplitude characterization, the left  
4 flexor was always used as a synchronization signal and the delay was fixed and  
5 corresponded to 140-190 ms depending on the rat gait pattern. In this protocol, the  
6 stimulation was delivered in the late right stance or corresponding early left stance. The  
7 amplitude values were linearly spaced within a functional range defined from a minimum  
8 visible effect (40-100  $\mu\text{A}$  before injury, 25-70  $\mu\text{A}$  after injury) to a maximum comfortable  
9 value for the animal (125-300  $\mu\text{A}$  before injury, 70-200  $\mu\text{A}$  after injury). For timing  
10 characterization, the synchronization was alternatively based on the right flexor and the  
11 left flexor or right extensor activity. The amplitude was fixed and equal to a medium value  
12 of the functional range. The delay varied among trials in order for the stimulation delivery  
13 to complementarily cover the whole gait cycle (0-200 ms for the flexors, 80-280 ms for  
14 the extensor, in steps of 40 ms). In specific cases of ipsilateral kinematics modulation, the  
15 trigger was detected from the right flexor signal, the delay was fixed (160 ms,  
16 corresponding to late left stance), and the amplitudes varied within the functional range  
17 (lower bound 50 and 100  $\mu\text{A}$ , upper bound 200 and 175  $\mu\text{A}$ ). In each characterization,  
18 trials were randomly permuted whenever possible.

### 19 Long-train cortical stimulation

20 For each tested rat, the cortical channel which evoked the strongest hindlimb responses  
21 was preliminarily selected by visual investigation. Awake resting rats were manually  
22 supported at the torso and forelimbs, while the hindlimbs were left relaxed with no support.  
23 Hindlimb responses to long-train stimuli (250ms, 330 Hz, biphasic, cathodic first pulses,  
24 200  $\mu\text{s}$ /phase) were captured on the camera (120 Hz). On three rats, EMG data from both  
25 ankle flexor muscles (Tibialis Anterior) was also collected synchronously (6 kHz).  
26 Stimulus amplitude was set at 100  $\mu\text{A}$  for all long-train experiments. Experiments were  
27 repeated in the intact state and weekly for three weeks after SCI. One intact rat received  
28 one single dose of ketamine (120mg/kg, IP) to confirm the absence of alternated evoked  
29 rhythms in this condition. The rat was tested 10 minutes after injection, while moderately  
30 sedated (corneal and paw withdrawal reflexes were preserved, but no overt spontaneous  
31 movement). In this case, only a stimulus amplitude of 150  $\mu\text{A}$  was delivered.

### 32 Current spread

33 Current propagation of intracortical microstimulation is regulated by a well-characterized  
34 physical law that takes into consideration the stimulation current and the propagation  
35 medium. The relationship between the distance  $r$  of the effective current spread from the  
36 electrode tip in mm and the current intensity  $I$  in  $\mu\text{A}$  is expressed by an equation of the  
37 form  $I=kr^2$  (Stoney et al., 1968), where the constant  $k$  for the cortical medium is equal to  
38 1292  $\mu\text{A}/\text{mm}^2$ . We verified that at no point during the experiments presented in this study  
39 we had a propagation further than half-millimeter distance given that we never exceeded  
40 300  $\mu\text{A}$  threshold for the stimulation current.

### 41 Histology

42 At the end of the experiments, the rats were euthanized with pentobarbital administration  
43 (Euthanyl, 100 mg/kg, intraperitoneal). Transcardiac perfusion was performed with a  
44 0.2% phosphate-buffered saline (PBS) solution followed by a 4% paraformaldehyde  
45 (PFA) solution (pH 7.4). The spinal cords were extracted and first stored in a 4% PFA

1 solution and then in a 20% sucrose solution. To evaluate the lesions, spinal sections  
2 around the T9 segment were cut in 40  $\mu$ m slices and tissue damage was assessed under  
3 a microscope. A reconstruction of the lesion profiles at the epicenter level was traced and  
4 the extent of healthy and damaged tissue was quantified.

#### 5 *Quantification and statistical analyses*

6  
7 All results are shown as the mean value  $\pm$  the standard error of the mean (SEM). The  
8 statistical analyses were performed with the Student's *t*-test for normally distributed  
9 populations or the Wilcoxon rank-sum test for other populations. All tests involved paired  
10 population samples. Samples with  $p < 0.05$  were considered statistically significant.

11

#### 12 **Funding**

13 This work was supported by the Craig H. Neilsen Foundation and the Natural Sciences  
14 and Engineering Research Council of Canada. M.M. was supported by a salary award  
15 from Fonds de Recherche Québec-Santé (FRQ-S). M.B. was supported by fellowships  
16 from the FRQ-S, the Institut de valorisation des données (IVADO), the TransMedTech  
17 Institute, and a departmental postdoctoral fellowship in memory of Tomás A. Reader.  
18 E.M. was supported by a fellowship from the TransMedTech Institute.

#### 19 **Acknowledgments**

20 The authors would like to thank Roxanne Drainville for her participation in animal  
21 handling, Émilie Délage and Victorine Artot for participating in data analysis; Andrew  
22 Brown and Mohamad Sawan for the fruitful discussion on this work's material and  
23 methods; Philippe Drapeau and Marc Bourdeau for technical assistance; Marjolaine  
24 Homier, Stéphane Ménard, Raphaël Santamaria and the staff at the Division des  
25 Animaleries for supporting our animal care.

#### 26 **Author contributions**

27 M.B. and M.M. conceived the research; E.M., M.B. and M.M. designed the experiments;  
28 M.B. developed the overall system integration; E.M. and M.B. performed the surgeries  
29 and collected the experimental data; E.M., M.B., M.M. analyzed the data; E.M. and M.B.  
30 drafted the manuscript; E.M., M.B., M.M., edited, revised manuscript and approved its  
31 final version.

#### 32 **Competing interests**

33 M.B. and M.M. submitted an international patent application (PCT/CA2020/051047)  
34 covering a device allowing performing coherent cortical stimulation during locomotion.  
35 They are founders of a company developing a stimulation-based therapy to restore  
36 movement after SCI.

## 1 References

- 2 Aizawa, H., Mushiake, H., Inase, M., & Tanji, J. (1990). An output zone of the monkey primary motor cortex  
3 specialized for bilateral hand movement. *Experimental brain research*, 82(1), 219-221.
- 4 Amboni, M., Barone, P., & Hausdorff, J. M. (2013). Cognitive contributions to gait and falls: evidence and  
5 implications. *Mov Disord*, 28(11), 1520-1533. <https://doi.org/10.1002/mds.25674>
- 6 Ames, K. C., & Churchland, M. M. (2019). Motor cortex signals for each arm are mixed across hemispheres  
7 and neurons yet partitioned within the population response. *Elife*, 8, e46159.
- 8 Andujar, J. E., Lajoie, K., & Drew, T. (2009). A contribution of area 5 of the posterior parietal cortex to the  
9 planning of visually-guided locomotion: limb specific and limb-independent effects. *J*  
10 *Neurophysiol.* <http://www.ncbi.nlm.nih.gov/pubmed/20018828>
- 11 Artoni, F., Fanciullacci, C., Bertolucci, F., Panarese, A., Makeig, S., Micera, S., & Chisari, C. (2017).  
12 Unidirectional brain to muscle connectivity reveals motor cortex control of leg muscles during  
13 stereotyped walking. *Neuroimage*, 159, 403-416.
- 14 Asboth, L., Friedli, L., Beauparlant, J., Martinez-Gonzalez, C., Anil, S., Rey, E., Baud, L., Pidpruzhnykova, G.,  
15 Anderson, M. A., Shkorbatova, P., Batti, L., Pages, S., Kreider, J., Schneider, B. L., Barraud, Q., &  
16 Courtine, G. (2018). Cortico-reticulo-spinal circuit reorganization enables functional recovery  
17 after severe spinal cord contusion. *Nat Neurosci*, 21(4), 576-588. [https://doi.org/10.1038/s41593-](https://doi.org/10.1038/s41593-018-0093-5)  
18 [018-0093-5](https://doi.org/10.1038/s41593-018-0093-5)
- 19 Axelson, H. W., Winkler, T., Flygt, J., Djupsjö, A., Hånell, A., & Marklund, N. (2013). Plasticity of the  
20 contralateral motor cortex following focal traumatic brain injury in the rat. *Restorative neurology*  
21 *and neuroscience*, 31(1), 73-85.
- 22 Blasi, V., Young, A. C., Tansy, A. P., Petersen, S. E., Snyder, A. Z., & Corbetta, M. (2002). Word retrieval  
23 learning modulates right frontal cortex in patients with left frontal damage. *Neuron*, 36(1), 159-  
24 170.
- 25 Bonizzato, M., James, N. D., Pidpruzhnykova, G., Pavlova, N., Shkorbatova, P., Baud, L., Martinez-Gonzalez,  
26 C., Squair, J. W., DiGiovanna, J., Barraud, Q., Micera, S., & Courtine, G. (2021). Multi-pronged  
27 neuromodulation intervention engages the residual motor circuitry to facilitate walking in a rat  
28 model of spinal cord injury. *Nat Commun*, 12(1), 1925. [https://doi.org/10.1038/s41467-021-](https://doi.org/10.1038/s41467-021-22137-9)  
29 [22137-9](https://doi.org/10.1038/s41467-021-22137-9)
- 30 Bonizzato, M., & Martinez, M. (2021). An intracortical neuroprosthesis immediately alleviates walking  
31 deficits and improves recovery of leg control after spinal cord injury. *Sci Transl Med*, 13(586).  
32 <https://doi.org/10.1126/scitranslmed.abb4422>
- 33 Bonizzato, M., Pidpruzhnykova, G., DiGiovanna, J., Shkorbatova, P., Pavlova, N., Micera, S., & Courtine, G.  
34 (2018). Brain-controlled modulation of spinal circuits improves recovery from spinal cord injury.  
35 *Nat Commun*, 9(1), 3015. <https://doi.org/10.1038/s41467-018-05282-6>
- 36 Brown, A. R., & Martinez, M. (2018). Ipsilesional Motor Cortex Plasticity Participates in Spontaneous  
37 Hindlimb Recovery after Lateral Hemisection of the Thoracic Spinal Cord in the Rat. *J Neurosci*,  
38 38(46), 9977-9988. <https://doi.org/10.1523/JNEUROSCI.1062-18.2018>
- 39 Brown, A. R., & Martinez, M. (2019a). From cortex to cord: motor circuit plasticity after spinal cord injury.  
40 *Neural regeneration research*, 14(12), 2054.
- 41 Brown, A. R., & Martinez, M. (2019b). Thoracic spinal cord hemisection surgery and open-field locomotor  
42 assessment in the rat. *JoVE (Journal of Visualized Experiments)*(148), e59738.
- 43 Brown, A. R., & Martinez, M. (2021). Chronic inactivation of the contralesional hindlimb motor cortex after  
44 thoracic spinal cord hemisection impedes locomotor recovery in the rat. *Experimental neurology*,  
45 113775.



- 1 Brus-Ramer, M., Carmel, J. B., & Martin, J. H. (2009). Motor cortex bilateral motor representation depends  
2 on subcortical and interhemispheric interactions. *J Neurosci*, 29(19), 6196-6206.  
3 <https://doi.org/10.1523/JNEUROSCI.5852-08.2009>
- 4 Caramia, M. D., Palmieri, M. G., Giacomini, P., Iani, C., Dally, L., & Silvestrini, M. (2000). Ipsilateral  
5 activation of the unaffected motor cortex in patients with hemiparetic stroke. *Clinical*  
6 *Neurophysiology*, 111(11), 1990-1996.
- 7 Chen, R., Cohen, L. G., & Hallett, M. (1997). Role of the ipsilateral motor cortex in voluntary movement.  
8 *Canadian Journal of Neurological Sciences*, 24(4), 284-291.
- 9 Chen, R., Gerloff, C., Hallett, M., & Cohen, L. G. (1997). Involvement of the ipsilateral motor cortex in finger  
10 movements of different complexities. *Annals of Neurology: Official Journal of the American*  
11 *Neurological Association and the Child Neurology Society*, 41(2), 247-254.
- 12 Cisek, P., Crammond, D. J., & Kalaska, J. F. (2003). Neural activity in primary motor and dorsal premotor  
13 cortex in reaching tasks with the contralateral versus ipsilateral arm. *Journal of neurophysiology*,  
14 89(2), 922-942.
- 15 Dancause, N., Barbay, S., Frost, S. B., Zoubina, E. V., Plautz, E. J., Mahnken, J. D., & Nudo, R. J. (2006).  
16 Effects of small ischemic lesions in the primary motor cortex on neurophysiological organization  
17 in ventral premotor cortex. *J Neurophysiol*, 96(6), 3506-3511.  
18 <http://www.ncbi.nlm.nih.gov/pubmed/16987930>
- 19 DiGiovanna, J., Dominici, N., Friedli, L., Rigosa, J., Duis, S., Kreider, J., Beauparlant, J., van den Brand, R.,  
20 Schieppati, M., Micera, S., & Courtine, G. (2016). Engagement of the Rat Hindlimb Motor Cortex  
21 across Natural Locomotor Behaviors. *J Neurosci*, 36(40), 10440-10455.  
22 <https://doi.org/10.1523/JNEUROSCI.4343-15.2016>
- 23 Donchin, O., Gribova, A., Steinberg, O., Bergman, H., & Vaadia, E. (1998). Primary motor cortex is involved  
24 in bimanual coordination. *Nature*, 395(6699), 274-278.
- 25 Ganguly, K., Secundo, L., Ranade, G., Orsborn, A., Chang, E. F., Dimitrov, D. F., Wallis, J. D., Barbaro, N. M.,  
26 Knight, R. T., & Carmena, J. M. (2009). Cortical representation of ipsilateral arm movements in  
27 monkey and man. *Journal of Neuroscience*, 29(41), 12948-12956.
- 28 Gossard, J. P., Delivet-Mongrain, H., Martinez, M., Kundu, A., Escalona, M., & Rossignol, S. (2015). Plastic  
29 Changes in Lumbar Locomotor Networks after a Partial Spinal Cord Injury in Cats. *J Neurosci*,  
30 35(25), 9446-9455. <https://doi.org/35/25/9446> [pii];10.1523/JNEUROSCI.4502-14.2015 [doi]
- 31 Graziano, M. S., Taylor, C. S., & Moore, T. (2002). Complex movements evoked by microstimulation of  
32 precentral cortex. *Neuron*, 34(5), 841-851. <https://www.ncbi.nlm.nih.gov/pubmed/12062029>
- 33 Grillner, S., & Wallen, P. (1985). Central pattern generators for locomotion, with special reference to  
34 vertebrates. *Ann. Rev. Neurosci*, 8, 233-261.
- 35 Hallett, M. (2001). Functional reorganization after lesions of the human brain: studies with transcranial  
36 magnetic stimulation. *Revue neurologique*, 157(8-9 Pt 1), 822-826.
- 37 Hicks, S. P., & D'Amato, C. J. (1975). Motor-sensory cortex-corticospinal system and developing  
38 locomotion and placing in rats. *Am. J. Anat*, 143, 1-42.
- 39 Hummel, F. C., & Cohen, L. G. (2006). Non-invasive brain stimulation: a new strategy to improve  
40 neurorehabilitation after stroke? *The Lancet Neurology*, 5(8), 708-712.
- 41 Jankowska, E., & Edgley, S. A. (2006). How can corticospinal tract neurons contribute to ipsilateral  
42 movements? A question with implications for recovery of motor functions. *The Neuroscientist*,  
43 12(1), 67-79.
- 44 Johansen-Berg, H., Rushworth, M. F., Bogdanovic, M. D., Kischka, U., Wimalaratna, S., & Matthews, P. M.  
45 (2002). The role of ipsilateral premotor cortex in hand movement after stroke. *Proceedings of the*  
46 *National Academy of Sciences*, 99(22), 14518-14523.
- 47 Jones, R. D., Donaldson, I. M., & Parkin, P. J. (1989). Impairment and recovery of ipsilateral sensory-motor  
48 function following unilateral cerebral infarction. *Brain*, 112(1), 113-132.

- 1 Kermadi, Y. L., EM Rouiller, I. (2000). Do bimanual motor actions involve the dorsal premotor (PMd),  
2 cingulate (CMA) and posterior parietal (PPC) cortices? Comparison with primary and  
3 supplementary motor cortical areas. *Somatosensory & motor research*, 17(3), 255-271.
- 4 Kim, S. H., Pohl, P. S., Luchies, C. W., Stylianou, A. P., & Won, Y. (2003). Ipsilateral deficits of targeted  
5 movements after stroke. *Archives of physical medicine and rehabilitation*, 84(5), 719-724.
- 6 Kwan, H. C., MacKay, W. A., Murphy, J. T., & Wong, Y. C. (1978). Spatial organization of precentral cortex  
7 in awake primates. II. Motor outputs. *J Neurophysiol*, 41(5), 1120-1131.  
8 <https://doi.org/10.1152/jn.1978.41.5.1120>
- 9 Leblond, H., Menard, A., & Gossard, J.-P. (2001). Corticospinal control of locomotor pathways generating  
10 extensor activities in the cat. *Exp. Brain Res*, 138(2), 173-184.  
11 <http://www.ncbi.nlm.nih.gov/pubmed/11417458>
- 12 Li, N., Daie, K., Svoboda, K., & Druckmann, S. (2016). Robust neuronal dynamics in premotor cortex during  
13 motor planning. *Nature*, 532(7600), 459-464.
- 14 Marque, P., Felez, A., Puel, M., Demonet, J., Guiraud-Chaumeil, B., Roques, C., & Chollet, F. (1997).  
15 Impairment and recovery of left motor function in patients with right hemiplegia. *Journal of*  
16 *Neurology, Neurosurgery & Psychiatry*, 62(1), 77-81.
- 17 Martinez, M., Brezun, J. M., Bonnier, L., & Xerri, C. (2009). A new rating scale for open-field evaluation of  
18 behavioral recovery after cervical spinal cord injury in rats. *J Neurotrauma*, 26(7), 1043-1053.  
19 <https://doi.org/10.1089/neu.2008.0717> [doi]
- 20 Martinez, M., Delivet-Mongrain, H., Leblond, H., & Rossignol, S. (2011). Recovery of hindlimb locomotion  
21 after incomplete spinal cord injury in the cat involves spontaneous compensatory changes within  
22 the spinal locomotor circuitry. *J. Neurophysiol*, 106(4), 1969-1984.  
23 <https://doi.org/10.1152/jn.00368.2011> [doi]
- 24 Mathis, A., Mamidanna, P., Cury, K. M., Abe, T., Murthy, V. N., Mathis, M. W., & Bethge, M. (2018).  
25 DeepLabCut: markerless pose estimation of user-defined body parts with deep learning. *Nat*  
26 *Neurosci*, 21(9), 1281-1289. <https://doi.org/10.1038/s41593-018-0209-y>
- 27 Metz, G. A., & Whishaw, I. Q. (2002). Cortical and subcortical lesions impair skilled walking in the ladder  
28 rung walking test: a new task to evaluate fore- and hindlimb stepping, placing, and co-ordination.  
29 *J Neurosci Methods*, 115(2), 169-179. <https://doi.org/S0165027002000122> [pii]
- 30 Michaels, J. A., & Scherberger, H. (2018). Population coding of grasp and laterality-related information in  
31 the macaque fronto-parietal network. *Scientific Reports*, 8(1), 1-15.
- 32 Miyai, I., Tanabe, H. C., Sase, I., Eda, H., Oda, I., Konishi, I., Tsunazawa, Y., Suzuki, T., Yanagida, T., & Kubota,  
33 K. (2001). Cortical mapping of gait in humans: a near-infrared spectroscopic topography study.  
34 *Neuroimage*, 14(5), 1186-1192. <https://doi.org/10.1006/nimg.2001.0905> [doi];S1053-  
35 8119(01)90905-X [pii]
- 36 Montgomery, L. R., Herbert, W. J., & Buford, J. A. (2013). Recruitment of ipsilateral and contralateral upper  
37 limb muscles following stimulation of the cortical motor areas in the monkey. *Experimental brain*  
38 *research*, 230(2), 153-164.
- 39 Nowak, D. A., Grefkes, C., Ameli, M., & Fink, G. R. (2009). Interhemispheric competition after stroke: brain  
40 stimulation to enhance recovery of function of the affected hand. *Neurorehabilitation and neural*  
41 *repair*, 23(7), 641-656.
- 42 Nudo, R. J., Wise, B. M., SiFuentes, F., & Milliken, G. W. (1996). Neural substrates for the effects of  
43 rehabilitative training on motor recovery after ischemic infarct. *Science*, 272(5269), 1791-1794.  
44 <http://www.ncbi.nlm.nih.gov/pubmed/8650578>
- 45 Orlovsky, G. N. (1972). The effect of different descending systems on flexor and extensor activity during  
46 locomotion. *Brain Res*, 40, 359-371.
- 47 Passingham, R., Perry, V., & Wilkinson, F. (1983). The long-term effects of removal of sensorimotor cortex  
48 in infant and adult rhesus monkeys. *Brain*, 106(3), 675-705.

- 1 Porro, C. A., Cettolo, V., Francescato, M. P., & Baraldi, P. (2000). Ipsilateral involvement of primary motor  
2 cortex during motor imagery. *European Journal of Neuroscience*, *12*(8), 3059-3063.
- 3 Rehme, A. K., Eickhoff, S. B., Rottschy, C., Fink, G. R., & Grefkes, C. (2012). Activation likelihood estimation  
4 meta-analysis of motor-related neural activity after stroke. *Neuroimage*, *59*(3), 2771-2782.
- 5 Rigosa, J., Panarese, A., Dominici, N., Friedli, L., van den Brand, R., Carpaneto, J., DiGiovanna, J., Courtine,  
6 G., & Micera, S. (2015). Decoding bipedal locomotion from the rat sensorimotor cortex. *J Neural*  
7 *Eng*, *12*(5), 056014. <https://doi.org/10.1088/1741-2560/12/5/056014>
- 8 Rosenzweig, E. S., Brock, J. H., Culbertson, M. D., Lu, P., Moseanko, R., Edgerton, V. R., Havton, L. A., &  
9 Tuszynski, M. H. (2009). Extensive spinal decussation and bilateral termination of cervical  
10 corticospinal projections in rhesus monkeys. *Journal of Comparative Neurology*, *513*(2), 151-163.
- 11 Serrien, D. J., Strens, L. H., Cassidy, M. J., Thompson, A. J., & Brown, P. (2004). Functional significance of  
12 the ipsilateral hemisphere during movement of the affected hand after stroke. *Experimental*  
13 *neurology*, *190*(2), 425-432.
- 14 Shimizu, T., Hosaki, A., Hino, T., Sato, M., Komori, T., Hirai, S., & Rossini, P. M. (2002). Motor cortical  
15 disinhibition in the unaffected hemisphere after unilateral cortical stroke. *Brain*, *125*(8), 1896-  
16 1907.
- 17 Silvano, J., & Pascual-Leone, A. (2012). Why the assessment of causality in brain-behavior relations  
18 requires brain stimulation. *Journal of cognitive neuroscience*, *24*(4), 775-777.
- 19 Smith, M.-C., & Stinear, C. M. (2016). Transcranial magnetic stimulation (TMS) in stroke: ready for clinical  
20 practice? *Journal of Clinical Neuroscience*, *31*, 10-14.
- 21 Stoeckel, M., & Binkofski, F. (2010). The role of ipsilateral primary motor cortex in movement control and  
22 recovery from brain damage. *Experimental neurology*, *221*(1), 13-17.
- 23 Stoney, S. D., Jr., Thompson, W. D., & Asanuma, H. (1968). Excitation of pyramidal tract cells by  
24 intracortical microstimulation: effective extent of stimulating current. *J Neurophysiol*, *31*(5), 659-  
25 669. <https://doi.org/10.1152/jn.1968.31.5.659>
- 26 Strens, L. H., Fogelson, N., Shanahan, P., Rothwell, J. C., & Brown, P. (2003). The ipsilateral human motor  
27 cortex can functionally compensate for acute contralateral motor cortex dysfunction. *Current*  
28 *Biology*, *13*(14), 1201-1205.
- 29 Turton, A., Wroe, S., Trepte, N., Fraser, C., & Lemon, R. (1996). Contralateral and ipsilateral EMG responses  
30 to transcranial magnetic stimulation during recovery of arm and hand function after stroke.  
31 *Electroencephalography and Clinical Neurophysiology/Electromyography and Motor Control*,  
32 *101*(4), 316-328.
- 33 Vahlsing, H. L., & Feringa, E. R. (1980). A ventral uncrossed corticospinal tract in the rat. *Experimental*  
34 *neurology*, *70*(2), 282-287.
- 35 Weidner, N., Ner, A., Salimi, N., & Tuszynski, M. H. (2001). Spontaneous corticospinal axonal plasticity and  
36 functional recovery after adult central nervous system injury. *Proc. Natl. Acad Sci. U. S. A*, *98*(6),  
37 3513-3518. <http://www.ncbi.nlm.nih.gov/pubmed/11248109>
- 38 Witte, O. W., Bidmon, H.-J., Schiene, K., Redecker, C., & Hagemann, G. (2000). Functional differentiation  
39 of multiple perilesional zones after focal cerebral ischemia. *Journal of Cerebral Blood Flow &*  
40 *Metabolism*, *20*(8), 1149-1165.
- 41 Yarosh, C. A., Hoffman, D. S., & Strick, P. L. (2004). Deficits in movements of the wrist ipsilateral to a stroke  
42 in hemiparetic subjects. *Journal of neurophysiology*, *92*(6), 3276-3285.
- 43 Yin, M., Borton, D. A., Komar, J., Agha, N., Lu, Y., Li, H., Laurens, J., Lang, Y., Li, Q., Bull, C., Larson, L., Rosler,  
44 D., Bezdard, E., Courtine, G., & Nurmikko, A. V. (2014). Wireless neurosensor for full-spectrum  
45 electrophysiology recordings during free behavior. *Neuron*, *84*(6), 1170-1182.  
46 <https://doi.org/10.1016/j.neuron.2014.11.010>

## 1 Supplemental figures and video

### A Hemisection profiles

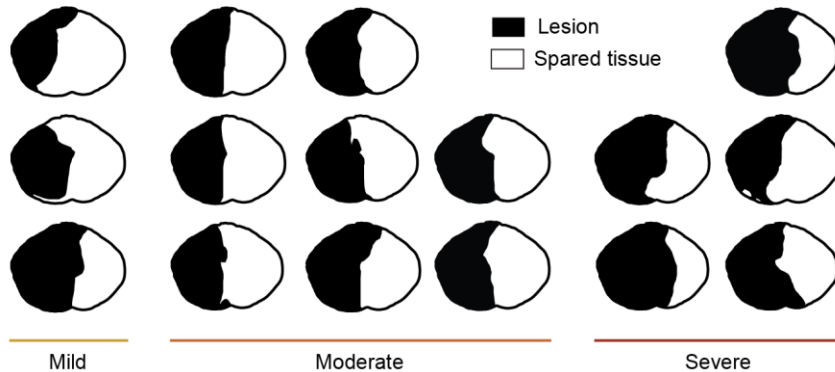

### B Classification of the injury severity

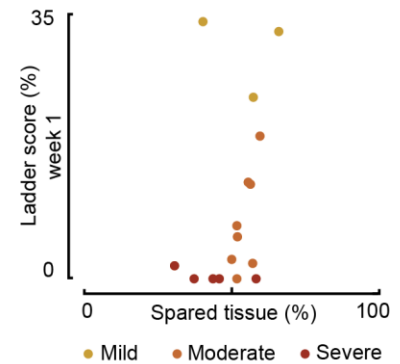

4 **Fig. S1. Histology (n=16). Related to Fig. 2 and Fig. 3. (A)** Hemisection profiles at the  
5 epicenter level. **(B)** Classification of the injury severity. Injury severity groups were defined  
6 according to skilled locomotion performance during ladder crossing 7 days after injury.  
7 The injuries were classified as mild: left hindlimb > 20% paw placement, moderate: left  
8 hindlimb < 20% paw placement and right hindlimb > 75% paw placement and severe:  
9 right hindlimb < 75% paw placement (bilateral deficits).

10 **Video 1. Cortical neuroprosthesis mediated control of ipsilateral hindlimb**  
11 **extension.** Treadmill walking during spontaneous locomotion and with phase-coherent  
12 stimulation 1 week after injury. The stimulation was delivered during the late right or early  
13 left stance and resulted in a flexion of the right hindlimb and a synchronous extension of  
14 the left hindlimb.

15  
16 **Video 2. Cortical neuroprosthesis mediated control of contralateral hindlimb**  
17 **flexion.** Treadmill walking during spontaneous locomotion and with phase-coherent  
18 stimulation 2 weeks after injury. The stimulation was delivered during the late left or early  
19 right stance and resulted in a flexion of the left hindlimb.

20  
21 **Video 3. Long-train cortical stimulation recruits spinal locomotor circuits.** Hindlimb  
22 responses to long-train intracortical stimulation in the intact state, with and without  
23 ketamine sedation, and at two time points (1 and 2 weeks) after SCI. The stimulation was  
24 delivered in resting rats manually supported at torso and forelimbs, with the hindlimbs left  
25 free to move.

| Rat # | Kinematics: intact rats (Fig. 1) | Kinematics: SCI rats (Fig. 2) | EMG analysis (Fig. 3) | Posture: injury severity (Fig. 4) | Posture: spontaneous recovery (Fig. 4) | Motor maps (Fig. 5) | Ipsilateral modulation (Fig. 6) | Long-train stimulation (Fig. 7) | Injury severity group |
|-------|----------------------------------|-------------------------------|-----------------------|-----------------------------------|----------------------------------------|---------------------|---------------------------------|---------------------------------|-----------------------|
| 1     | ✓                                | ✓                             | ✓                     | ✓                                 | ✓                                      | ✓                   |                                 |                                 | moderate              |
| 2     | ✓                                | ✓                             | ✓                     | ✓                                 | ✓                                      | ✓                   |                                 |                                 | severe                |
| 3     | ✓                                |                               |                       | ✓                                 | ✓                                      | ✓                   |                                 | ✓                               | moderate              |
| 4     | ✓                                | ✓                             | ✓                     | ✓                                 |                                        | array failure       |                                 |                                 | mild                  |
| 5     | ✓                                | ✓                             | ✓                     | ✓                                 |                                        | ✓                   | ✓                               | ✓                               | mild                  |
| 6     | ✓                                | ✓                             | ✓                     | ✓                                 |                                        | ✓                   |                                 | ✓                               | severe                |
| 7     |                                  | ✓                             | ✓                     | ✓                                 |                                        | ✓                   |                                 |                                 | mild                  |
| 8     |                                  | ✓                             | ✓                     | ✓                                 |                                        | ✓                   | ✓                               | ✓                               | moderate              |
| 9     |                                  |                               |                       | ✓                                 | ✓                                      | array failure       |                                 | ✓                               | moderate              |
| 10    |                                  |                               |                       | ✓                                 | ✓                                      | ✓                   |                                 | ✓                               | moderate              |
| 11    |                                  |                               |                       | ✓                                 | ✓                                      | ✓                   |                                 |                                 | moderate              |
| 12    |                                  |                               |                       | ✓                                 | ✓                                      | ✓                   |                                 |                                 | moderate              |
| 13    |                                  |                               |                       | ✓                                 | ✓                                      | ✓                   |                                 |                                 | mild                  |
| 14    |                                  |                               |                       | ✓                                 | ✓                                      | array failure       |                                 |                                 | severe                |
| 15    |                                  |                               |                       | ✓                                 | ✓                                      | array failure       |                                 |                                 | moderate              |
| 16    |                                  |                               |                       | ✓                                 | ✓                                      | ✓                   |                                 |                                 | moderate              |
| 17*   |                                  |                               |                       | ✓                                 |                                        |                     |                                 |                                 | severe                |
| 18*   |                                  |                               |                       | ✓                                 |                                        |                     |                                 |                                 | moderate              |
| 19*   |                                  |                               |                       | ✓                                 |                                        |                     |                                 |                                 | moderate              |
| 20*   |                                  |                               |                       | ✓                                 |                                        |                     |                                 |                                 | mild                  |
| 21*   |                                  |                               |                       | ✓                                 |                                        |                     |                                 |                                 | moderate              |
| 22*   |                                  |                               |                       | ✓                                 |                                        |                     |                                 |                                 | moderate              |
| 23*   |                                  |                               |                       | ✓                                 | ✓                                      |                     |                                 |                                 | moderate              |
| 24*   |                                  |                               |                       | ✓                                 | ✓                                      |                     |                                 |                                 | mild                  |
| 25*   |                                  |                               |                       | ✓                                 | ✓                                      |                     |                                 |                                 | moderate              |
| 26*   |                                  |                               |                       | ✓                                 | ✓                                      |                     |                                 |                                 | moderate              |
| 27*   |                                  |                               |                       | ✓                                 | ✓                                      |                     |                                 |                                 | moderate              |
| 28*   |                                  |                               |                       | ✓                                 | ✓                                      |                     |                                 |                                 | moderate              |
| 29*   |                                  |                               |                       | ✓                                 | ✓                                      |                     |                                 |                                 | mild                  |
| 30*   |                                  |                               |                       | ✓                                 | ✓                                      |                     |                                 |                                 | moderate              |
| 31*   |                                  |                               |                       | ✓                                 | ✓                                      |                     |                                 |                                 | severe                |
| 32*   |                                  |                               |                       | ✓                                 | ✓                                      |                     |                                 |                                 | mild                  |
| 33*   |                                  |                               |                       | ✓                                 | ✓                                      |                     |                                 |                                 | moderate              |
| 34*   |                                  |                               |                       | ✓                                 | ✓                                      |                     |                                 |                                 | moderate              |
| 35*   |                                  |                               |                       | ✓                                 | ✓                                      |                     |                                 |                                 | severe                |
| 36*   |                                  |                               |                       | ✓                                 | ✓                                      |                     |                                 |                                 | moderate              |
| 37*   |                                  |                               |                       | ✓                                 | ✓                                      |                     |                                 |                                 | moderate              |
| 38*   |                                  |                               |                       | ✓                                 | ✓                                      |                     |                                 |                                 | moderate              |
| 39*   |                                  |                               |                       | ✓                                 | ✓                                      |                     |                                 |                                 | moderate              |
| 40*   |                                  |                               |                       | ✓                                 | ✓                                      |                     |                                 |                                 | mild                  |
| 41*   |                                  |                               |                       | ✓                                 | ✓                                      |                     |                                 |                                 | moderate              |

1

2 **Table 1. List of animals engaged in each experiment.** Rats marked with \* did not  
3 receive left motor cortex implantation. They were included in the study for establishing  
4 spontaneous changes in posture over time (Fig. 4A-B).
